# Supplementary material for: Involving adolescents in the design, implementation, evaluation and dissemination of health research: an umbrella review protocol
Source: PubMed Central journal article supplement — BMJ Open. 2023 Jun 2;13(6):e069695. doi: 10.1136/bmjopen-2022-069695 (PMC10254960; doi:10.1136/bmjopen-2022-069695), 2023-06-02
Supplement: bmjopen-2022-069695.draft_revisions.pdf [file bmjopen-2022-069695.draft_revisions.pdf]

# BMJ Open

BMJ Open is committed to open peer review. As part of this commitment we make the peer review history of every article we publish publicly available.

When an article is published we post the peer reviewers' comments and the authors' responses online. We also post the versions of the paper that were used during peer review. These are the versions that the peer review comments apply to.

The versions of the paper that follow are the versions that were submitted during the peer review process. They are not the versions of record or the final published versions. They should not be cited or distributed as the published version of this manuscript.

BMJ Open is an open access journal and the full, final, typeset and author-corrected version of record of the manuscript is available on our site with no access controls, subscription charges or pay-per-view fees (<http://bmjopen.bmj.com>).

If you have any questions on BMJ Open's open peer review process please email [info.bmjopen@bmj.com](mailto:info.bmjopen@bmj.com)

# BMJ Open

## Involving adolescents in the design, implementation, evaluation, and dissemination of health research: an umbrella review protocol

|                               |                                                                                                                                                                                                                                                                                                                                                                                                                                                                                                                                                                                                                                                                                           |
|-------------------------------|-------------------------------------------------------------------------------------------------------------------------------------------------------------------------------------------------------------------------------------------------------------------------------------------------------------------------------------------------------------------------------------------------------------------------------------------------------------------------------------------------------------------------------------------------------------------------------------------------------------------------------------------------------------------------------------------|
| Journal:                      | <i>BMJ Open</i>                                                                                                                                                                                                                                                                                                                                                                                                                                                                                                                                                                                                                                                                           |
| Manuscript ID                 | bmjopen-2022-069695                                                                                                                                                                                                                                                                                                                                                                                                                                                                                                                                                                                                                                                                       |
| Article Type:                 | Protocol                                                                                                                                                                                                                                                                                                                                                                                                                                                                                                                                                                                                                                                                                  |
| Date Submitted by the Author: | 29-Oct-2022                                                                                                                                                                                                                                                                                                                                                                                                                                                                                                                                                                                                                                                                               |
| Complete List of Authors:     | Warritch, Azza; Trinity College Dublin, Trinity Centre for Global Health; Trinity College Dublin, School of Psychology<br>Bruce, Delali; Trinity College Dublin, Trinity Centre for Global Health; Stanford University, School of Engineering<br>Lee, Maria; Trinity College Dublin, Trinity Centre for Global Health; Trinity College Dublin, School of Psychology<br>Curran, Paul; Trinity College Dublin, School of Psychology<br>Khraisha, Qusai; Trinity College Dublin, Trinity Centre for Global Health; Trinity College Dublin, School of Psychology<br>Hadfield, Kristin; Trinity College Dublin, Trinity Centre for Global Health; Trinity College Dublin, School of Psychology |
| Keywords:                     | PAEDIATRICS, Protocols & guidelines < HEALTH SERVICES ADMINISTRATION & MANAGEMENT, Community child health < PAEDIATRICS                                                                                                                                                                                                                                                                                                                                                                                                                                                                                                                                                                   |
|                               |                                                                                                                                                                                                                                                                                                                                                                                                                                                                                                                                                                                                                                                                                           |

SCHOLARONE™  
Manuscripts

1  
2  
3 1 **Involving adolescents in the design, implementation, evaluation, and dissemination of**  
4  
5  
6 2 **health research: an umbrella review protocol**  
7  
8 3  
9  
10 4  
11  
12 5  
13

14 6 Azza Warraitch\*<sup>1,2</sup>, Delali Bruce<sup>1,3</sup>, Maria Lee<sup>1,2</sup>, Paul Curran<sup>2</sup>, Qusai Khraisha<sup>1,2</sup>, Kristin  
15  
16  
17 7 Hadfield<sup>1,2</sup>  
18  
19 8  
20  
21  
22 9

23  
24 10 <sup>1</sup> Trinity Centre for Global Health, Trinity College Dublin, Dublin, Ireland.  
25

26 11 <sup>2</sup> School of Psychology, Trinity College Dublin, Dublin, Ireland.  
27

28 12 <sup>3</sup> School of Engineering, Stanford University, United States.  
29

30  
31  
32  
33  
34  
35  
36  
37  
38  
39  
40  
41  
42  
43  
44  
45  
46  
47  
48  
49  
50  
51  
52  
53  
54  
55  
56  
57  
58  
59  
60

\*Correspondence: [warraita@tcd.ie](mailto:warraita@tcd.ie)

## 14 Abstract

15 **Introduction:** A lack of awareness on *how* to engage adolescents in research has been reported as  
16 one of the barriers to meaningful youth involvement in health research. Currently available  
17 guidelines on youth involvement are limited in terms of the scope (e.g., focused on limited health  
18 research areas), content (e.g., include broad principles), and context (e.g., most guidelines are from  
19 high-income countries) for which the guidelines are applicable. To address this, we will develop a  
20 set of comprehensive guidelines based on consolidated evidence on youth involvement in health  
21 research. To inform these guidelines, we are first conducting an umbrella review to i) summarize  
22 and synthesize findings from reviews on involving adolescents in health research, ii) consolidate  
23 the challenges experienced in youth involvement and the recommendations to mitigate these  
24 challenges, iii) identify best practices, and iv) identify gaps and methodological weaknesses in the  
25 extant literature on involving adolescents in health research.

26 **Methods and analysis:** We will include review articles exploring adolescents' involvement in  
27 studies aiming to improve their physical or mental health. Databases to be searched include  
28 Cochrane Database of Systematic Reviews, Medical Literature Analysis and Retrieval System Online  
29 (MEDLINE), Scopus, Embase, PsycINFO, PsycArticles, Cumulative Index to Nursing and Allied  
30 Health Literature (CINAHL), Epistemonikos, and Health Systems Evidence. A grey literature search  
31 will be conducted in Web of Science, ProQuest, Google Scholar, and PROSPERO, supplemented  
32 by a hand search of the reference lists of eligible reviews, relevant journals, websites of related  
33 organizations, and input from experts. Data will be analyzed using narrative synthesis.

34 **Ethics and dissemination:** Ethical approval is not required as we are not collecting participant data  
35 as part of this review. The findings of this umbrella review will be disseminated through peer-  
36 reviewed publications, participatory workshops, and academic conferences.

1  
2  
3 37 **Umbrella review registration:** PROSPERO [CRD42021287467](https://www.crd.york.ac.uk/PROSPERO/record/CRD42021287467).

4  
5 38 **Strengths and limitations of this study**

- 6  
7  
8 39 • This umbrella review consolidates evidence from a highly varied range of reviews on youth  
9  
10 40 involvement in health research, using a rigorous methodology and a comprehensive search  
11  
12 41 strategy.
- 13  
14  
15 42 • This umbrella review will be conducted with active involvement from adolescents  
16  
17 43 throughout to improve the relevance, quality, and dissemination of the findings.
- 18  
19 44 • Only reviews published in English will be included.
- 20  
21  
22 45

23  
24  
25 46 **Keywords:** Youth involvement, Participatory action research, Public and Patient Involvement  
26  
27 47 (PPI), Health Research, Adolescent health.

28  
29  
30  
31  
32  
33  
34  
35  
36  
37  
38  
39  
40  
41  
42  
43  
44  
45  
46  
47  
48  
49  
50  
51  
52  
53  
54  
55  
56  
57  
58  
59  
60

## 48 **Introduction**

49 Adolescents aged 10–24 years comprise 24% of the world's population (1). In the past two decades,  
50 there has been a global shift in attention towards the promotion of adolescent health (2, 3). The  
51 recent prioritization of adolescent health in global strategies (4, 5) is underpinned by a number of  
52 factors. First, adolescents experience a considerable proportion of the global population's disease  
53 burden, attributed to different communicable and non-communicable diseases and injuries (6, 7).  
54 Around 168 million Disability-Adjusted Life Years (DALYs) are lost to adolescents' mental health  
55 and physical health difficulties (6, 7). Second, establishing healthy behavioral patterns and  
56 minimizing exposure to risk factors among adolescents is a strong determinant for future health  
57 trajectories and can also improve the health of the next generation (3, 6). Third, the substantial  
58 improvements in maternal and child health outcomes, which have been achieved in recent decades  
59 through considerable global efforts, are at risk without adequate investments in adolescent health  
60 (3, 6, 8, 9). Lastly, improvement in adolescent health outcomes promotes their productivity,  
61 academic success, and future financial stability, and reduces the direct and indirect costs associated  
62 with disease burden, resulting in societal and economic benefits (3, 6, 10-13). For these reasons,  
63 adolescence is now widely considered a critical period in which to invest (3, 5, 9, 14), as reflected  
64 in the increase in development assistance for adolescent health, from 109.7 million dollars in 2003  
65 to 528.5 million dollars in 2015 (15).

66 Heralded by the UN Convention on the Rights of the Child, the involvement of young people in  
67 all decisions that affect their lives, including those relating to health and wellbeing, is now widely  
68 acknowledged as their fundamental right (16, 17). One method of including youth in such  
69 decisions is to engage them in the research process. Health research is an important avenue for  
70 informing the design of healthcare services and care provision to young people, as well as health

1  
2  
3 71 policy. Meaningful involvement of youth in health research is defined as "research that is done  
4  
5 72 'with' or 'by'" young people, "not 'to', 'about' or 'for' them" (18, 19). Adolescents can be engaged  
6  
7  
8 73 to define and prioritize research questions, design the research process, ensure the appropriateness  
9  
10 74 of the research methodology for the young population, collect and analyze data, and disseminate  
11  
12 75 the research findings (17, 19-24). There are several frameworks to describe the involvement of  
13  
14 76 children and adolescents in research and health services. These include Hart's ladder of young  
15  
16 77 people's participation framework(25), Shier's pathways to participation framework (26), Treseder's  
17  
18 78 non-linear model of participation (27), Wong's TYPE Pyramid framework (28), Arunkumar's rope  
19  
20 79 ladder model (29), and the five-dimensional framework for young people's involvement in health  
21  
22 80 research (19). The frameworks most commonly used to describe and evaluate youth involvement  
23  
24 81 are those proposed by Roger Hart(25) and Harry Shier (26).

25  
26  
27  
28  
29 82 In recent years, there has been an increasing emphasis on the meaningful involvement of  
30  
31 83 adolescents in health research, using participatory approaches (17, 23, 30-35). Three driving  
32  
33 84 factors explain the context of this change around the involvement of adolescents in health research  
34  
35 85 and service delivery(33). The first one is "consumer movement" (36), also equated with the term  
36  
37 86 "user involvement", emerging in the 1970s, that focuses on the integration of patients' views to  
38  
39 87 ensure responsive and acceptable health services (33, 37). This approach has assumed a central  
40  
41 88 position in NHS health policy for adults since the late nineties (38-40) and now encompasses the  
42  
43 89 involvement of adolescents in the design and delivery of health services and research (22, 33, 41).  
44  
45  
46  
47  
48 90 Second, Article 12 of the UN Convention on the Rights of the Child (16) emphasized that children  
49  
50 91 and adolescents have a right to contribute to decisions regarding all matters relevant to young  
51  
52 92 people and that their views must be taken into account. Almost all countries have now ratified this  
53  
54 93 convention to achieve health equity by sharing power over decisions about adolescents (6, 42).  
55  
56  
57  
58  
59  
60

1  
2  
3 94 This has led to a change in the perception of adolescents as social actors rather than passive  
4  
5 95 recipients of care and services designed and delivered by adult professionals (33, 34). This has  
6  
7  
8 96 also resulted in an unprecedented demand for the representation of adolescents in health-related  
9  
10 97 decision-making, with multiple health and funding organizations strongly advocating for the  
11  
12 98 meaningful involvement of adolescents in health research to achieve the 2030 agenda for  
13  
14  
15 99 Sustainable Development (3, 17, 19, 43-45).

16  
17  
18 100 Third, preliminary evidence on the impact of adolescents' contribution in health research highlights  
19  
20 101 multiple benefits of youth involvement from an operational, developmental, and societal  
21  
22 102 perspective (3, 6, 17, 19, 22, 33, 46, 47), further strengthening the cause for youth involvement.  
23  
24  
25 103 From an operational perspective, the involvement of adolescents improves research in several  
26  
27 104 ways: i) it ensures that the research questions reflect the needs and preferences of adolescents (17,  
28  
29 105 19, 21, 48), ii) enhances the recruitment and retention rates of participants (19, 49-53), iii)  
30  
31 106 improves data collection (19, 21, 54-58), iv) improves data analysis by bringing unique insight of  
32  
33  
34 107 adolescents in translating the responses (19, 59, 60), and v) facilitates broader and more effective  
35  
36 108 dissemination of the findings (6, 19, 56, 61). Moreover, organizations that work with adolescents  
37  
38  
39 109 report an overall change in the organization's culture to be more inclusive (62). From a  
40  
41 110 developmental perspective, several positive outcomes have been reported for adolescents who  
42  
43 111 contribute to research projects, including i) learning new research skills (19, 46, 63-68), ii)  
44  
45 112 increased knowledge about health topics (19, 46, 50, 69-71), iii) better health outcomes (19, 46,  
46  
47 113 70, 72), and iv) better academic or career outcomes (6, 19, 22, 63, 73-75). At the societal level, the  
48  
49  
50 114 involvement of adolescents has been linked with an increased awareness of different health issues  
51  
52 115 in the community (17, 19, 62, 76-79).

53  
54  
55 116 Despite growing recognition of the fundamental rights of adolescents to contribute to research and  
56  
57  
58  
59  
60



1  
2  
3 117 the potential benefits of involving them in research, Sellars et al. (2020) (17) found that less than  
4  
5 118 1% of studies on child and adolescent health report involving adolescents as part of advisory  
6  
7  
8 119 groups. While involving young people in health research is on the rise, the overall number of  
9  
10 120 studies that involve youth is still low (19). This under-involvement of adolescents in health  
11  
12 121 research may be attributed to the challenges or barriers experienced by researchers and adolescents  
13  
14 122 contributing to research projects (17). These challenges include a lack of awareness of the evidence  
15  
16 123 on youth involvement (19, 80), a need for extensive training to effectively engage youth in research  
17  
18 124 (17, 19, 47, 56, 80-86), limited training resources and a lack of a comprehensive set of guidelines  
19  
20 125 on engaging youth in health research (19, 47, 80, 87, 88), inadequate funding to support meaningful  
21  
22 126 youth involvement (82, 85, 89), difficulties in recruiting and retaining adolescents (85, 86, 90),  
23  
24 127 complex ethical procedures such as additional consent and assent requirements, and compliance  
25  
26 128 with different safeguarding practices that vary for different contexts (48, 56, 91). To address some  
27  
28 129 of the highlighted challenges to meaningful youth involvement, we aim to develop a  
29  
30 130 comprehensive set of guidelines for involving youth in health research. This umbrella review will  
31  
32 131 inform the development of these guidelines by consolidating the review-level evidence on youth  
33  
34 132 involvement in health research. There are numerous reviews on youth involvement in health  
35  
36 133 research. However, these reviews focus on specific areas of health research (e.g., sexual and  
37  
38 134 reproductive health, mental health), certain types of youth involvement approaches (e.g., peer-  
39  
40 135 mediated interventions, participatory action research), specific locations (e.g., United States of  
41  
42 136 America, India), and are heterogenous in their methods (e.g., search different databases, use  
43  
44 137 different age groups etc.) and findings. Furthermore, there is little overlap in the studies that are  
45  
46 138 included in these reviews, highlighting the need to bring together all available evidence on youth  
47  
48 139 involvement in different areas of health research in different contexts and to translate these findings  
49  
50  
51  
52  
53  
54  
55  
56  
57  
58  
59  
60

1  
2  
3 140 into recommendations. Given the broad scope of the research objectives and the heterogeneity in  
4  
5 141 the extant literature, an umbrella review is a more suitable choice of review than a systematic  
6  
7  
8 142 review of primary studies (92).

9  
10  
11 143 Therefore, we aim to conduct an umbrella review to i) summarize and synthesize findings from  
12  
13 144 reviews on involving adolescents in health research, ii) consolidate the challenges experienced in  
14  
15 145 youth involvement and the recommendations to mitigate these challenges, iii) identify the best  
16  
17 146 practices or recommendations on involving adolescents in health research, and iv) identify gaps  
18  
19  
20 147 and methodological weaknesses in the extant literature.

## 21 22 148 **Methods and analysis**

23  
24 149 This umbrella review will be conducted as per the Cochrane guidelines for overviews of reviews  
25  
26  
27 150 (93). However, some elements—types of reviews to be included and the appraisal method, in  
28  
29 151 particular—have been adapted (described below) to suit the objectives of the umbrella review. We  
30  
31 152 followed the Preferred Reporting Items for Systematic Review and Meta-Analysis Protocols  
32  
33 153 (PRISMA-P) guidelines in reporting this protocol (Additional file 1). We will report findings in  
34  
35  
36 154 accordance with the Preferred Reporting Items for Systematic Review and Meta-Analysis  
37  
38 155 (PRISMA) statement (94) given that the PRISMA extension for overviews of reviews (Preferred  
39  
40 156 Reporting Items for Overviews of Reviews; PRIOR) is under development and is thus not available  
41  
42  
43 157 for this umbrella review (95). The umbrella review has been registered with the International  
44  
45 158 Prospective Register of Systematic Reviews (PROSPERO CRD42021287467). The PROSPERO  
46  
47 159 registration was updated to pre-register some changes to the methodology described below.

## 48 49 50 160 **Search strategy**

51  
52  
53 161 The search strategy for this umbrella review includes keywords for; a) population (adolescents  
54  
55 162 aged 10-24 years) (96), b) intervention or exposure (involvement of adolescents in health  
56  
57  
58  
59  
60

1  
2  
3 163 research), c) condition under study (health of adolescents), and d) review type (including  
4  
5 164 narrative reviews, targeted reviews, rapid reviews, scoping reviews, literature reviews,  
6  
7  
8 165 qualitative reviews, integrated reviews, evidence maps, critical reviews, mixed methods reviews,  
9  
10 166 overviews, state of the art reviews, practitioner reviews, systematic reviews, as well as meta-  
11  
12 167 analyses) using Boolean syntax. Authors AW and KH developed the search strategy in  
13  
14  
15 168 consultation with a research librarian (GF) at Trinity College Dublin.

16  
17 169 A commonly reported problem in studying youth involvement is the inconsistent use of  
18  
19  
20 170 terminologies and a wide range of methodologies classified as youth involvement (19, 47). The  
21  
22 171 search strategy is attached in the supplementary materials (Additional File 2).  
23  
24

## 25 172 **Information sources**

### 26 27 173 **Electronic databases**

28  
29  
30 174 We will search Cochrane Database of Systematic Reviews, Medical Literature Analysis and  
31  
32 175 Retrieval System Online (MEDLINE), Scopus, Embase, PsycINFO, PsycArticles, Cumulative  
33  
34 176 Index to Nursing and Allied Health Literature (CINAHL), Epistemonikos, and Health Systems  
35  
36  
37 177 Evidence databases for potentially eligible reviews conducted up to 30<sup>th</sup> November 2021.  
38  
39

### 40 178 **Grey literature search**

41  
42  
43 179 The grey literature search involves several components. First, a simplified search strategy – based  
44  
45 180 on different combinations of fewer key search terms – will be used to search Google Scholar for  
46  
47 181 additional reviews. The Google Scholar search will be restricted to the first 10 pages. Second,  
48  
49  
50 182 we will identify the top 10 ranking pediatrics, perinatology, and child health journals using the  
51  
52 183 Scimago Journal and Country Rank list for 2020 (17). A similar simplified version of the search  
53  
54 184 strategy will be used to search these journals for additional reviews that could be potentially  
55  
56  
57  
58  
59

1  
2  
3 185 eligible for inclusion. Third, Web of Science and ProQuest will be searched to identify additional  
4  
5 186 conference abstracts, theses, reports, and unpublished relevant reviews. The search strategy will  
6  
7  
8 187 be modified to suit the interface of these databases, as required. The search strategy for Web of  
9  
10 188 Science is attached in the supplementary materials (Additional File 3). Fourth, we will search for  
11  
12 189 relevant reviews registered on PROSPERO. Authors of potentially eligible reviews will be  
13  
14  
15 190 contacted to check whether the reviews are close to completion or have been completed. The  
16  
17 191 authors will be requested to share the extracted data for inclusion in the umbrella review for  
18  
19 192 complete or close to completion reviews. The number of contacts made and the number of  
20  
21 193 authors who agreed to share the data will be recorded and reported. Fifth, websites of relevant  
22  
23 194 organizations will also be searched for grey literature. This will involve compiling a list of  
24  
25 195 organizations (including governmental, non-profit, and funding organizations) working on  
26  
27 196 adolescents' health. We will conduct a targeted search of up to 20 pages of Google, the Mental  
28  
29 197 Health Innovation Network database, and including organizations known to the authors. Then,  
30  
31 198 we will search for relevant documents by running a simplified search strategy, like the one used  
32  
33 199 for searching Google Scholar, on the website homepages of these organizations. The first ten  
34  
35 200 pages of the results will be searched. Websites without a search option will be hand-searched.  
36  
37 201 We will also search Google for youth health organizations in low- and middle-income countries  
38  
39 202 and search the website of one organization (top google result) for each country. Names of all  
40  
41 203 organizational websites searched, and the titles and URL links to eligible materials will be  
42  
43 204 extracted in the excel spreadsheet for grey literature, which will be posted on the review's [Open](#)  
44  
45 205 [Science Framework \(OSF\) page](#). Sixth, we will contact five to ten experts in youth involvement  
46  
47 206 in health research. They will be regarded as an expert if, a) they oversee youth involvement in  
48  
49 207 health research component at a funding organization (e.g., Wellcome Trust, Grand Challenges  
50  
51  
52  
53  
54  
55  
56  
57  
58  
59  
60

1  
2  
3 208 Canada) or youth health organization and/or, b) have conducted studies which involved  
4  
5 209 adolescents as collaborators at different stages of the research process. We will include experts  
6  
7 210 from high-, middle-, and low-income countries. After identifying potential experts to be  
8  
9 211 contacted, we will send them an email stating the aims of the umbrella review, eligibility criteria  
10  
11 212 for reviews, and a statement requesting that they share the references of any relevant materials  
12  
13 213 they might be familiar with. Seventh, reference lists of all eligible reviews will be reviewed to  
14  
15 214 identify further relevant reviews. Finally, all the eligible reviews will be entered in the  
16  
17 215 connectedpapers software to identify similar papers. This comprehensive strategy aims to  
18  
19 216 identify all published and unpublished reviews on this topic and get the broadest range of views  
20  
21 217 possible for inclusion in the umbrella review.  
22  
23  
24  
25  
26

### 27 218 **Data management**

28  
29  
30 219 All references from electronic databases will be exported to Covidence. We will record the search  
31  
32 220 date, the number of results for each database and each combination of the search terms for grey  
33  
34 221 literature search. For the grey literature, titles and URL links to potentially relevant documents  
35  
36 222 will be entered in an excel spreadsheet for grey literature (97).  
37  
38

### 39 223 **Eligibility Criteria**

### 40 224 **Study Design**

41  
42  
43  
44 225 Only review articles will be eligible for inclusion in this umbrella review. Although the Cochrane  
45  
46 226 Overview of reviews guidelines recommend including systematic reviews and meta-analysis, we  
47  
48 227 will include review articles of all types, including narrative reviews, targeted reviews, rapid  
49  
50 228 reviews, scoping reviews, literature reviews, qualitative reviews, integrated reviews, evidence  
51  
52 229 maps, critical reviews, desk reviews, mixed methods reviews, overviews, state of the art reviews,  
53  
54 230 practitioner reviews, systematic reviews, as well as meta-analyses (98). This adaptation to the  
55  
56  
57  
58  
59  
60

1  
2  
3 231 guidelines is due to the qualitative nature of the outcomes of interest and to ensure the inclusion  
4  
5 232 of a wide range of literature on youth involvement. This adaptation to the guidelines is common  
6  
7  
8 233 in umbrella reviews focusing on qualitative data and outcomes(99).  
9

## 10 234 **Participants**

11  
12  
13  
14 235 We will only include reviews that discuss youth-specific results; the age range of participants in  
15  
16 236 studies included in the review can vary, but the target population of the review must include  
17  
18 237 adolescents. Adolescents are young people between the ages of 10 to 24 years as defined by  
19  
20 238 Sawyer et al. (96). All reviews focusing on children and adolescents irrespective of the age range  
21  
22  
23 239 (as long as these include some studies for adolescents aged between 10 and 24 years) will be  
24  
25 240 included, but primary studies where the age range of the target population is below ten years or  
26  
27 241 above 24 years will be excluded. Reviews and studies where the age range is not mentioned, rather  
28  
29 242 the terms children and adolescents are listed will be included. No other restrictions will be applied  
30  
31 243 based on demographic characteristics or context.  
32  
33  
34

## 35 244 **Intervention**

36  
37  
38 245 Reviews exploring youth involvement in studies that focus on the promotion of physical and  
39  
40 246 mental health or treatment of physical and mental health difficulties among adolescents will be  
41  
42 247 eligible. Youth involvement refers to a wide range of methods and strategies used to involve young  
43  
44  
45 248 people in the design, conduct, analysis and dissemination of research on adolescent health.  
46  
47

## 48 249 **Outcomes**

49  
50  
51 250 Reviews including one or more of the following outcomes will be eligible for inclusion: i)  
52  
53 251 strategies that have been used to involve adolescents in conducting health research, ii)  
54  
55 252 recommendations for involving adolescents in health research (best practices), iii) barriers to  
56  
57  
58  
59  
60

253 meaningful youth involvement, iv) mitigation strategies to address these barriers and, v) evidence  
254 gaps in youth involvement in health research.

### 255 **Other criteria**

256 Only reviews published in the English language will be considered for inclusion. Reviews where  
257 data extraction tables for the primary studies (applicable to systematic, rapid, and scoping reviews)  
258 are inaccessible will be excluded. As per the Cochrane guidelines for overviews of reviews (93),  
259 if a review's research objectives and scope are broader than the current umbrella review, the subset  
260 of primary studies meeting the review's eligibility criteria will be included in this umbrella review.

### 261 **Selection of studies**

262 Search results will be imported into Covidence for the removal of duplicate references. The  
263 eligibility criteria will be discussed among researchers conducting the title and abstract screening  
264 to ensure mutual understanding of the criteria. Title and abstract screening of the studies will be  
265 undertaken by two postgraduate-level psychology students and an adolescent co-researcher. They  
266 will first conduct a pilot screening of 1% of randomly selected search results. Any discrepancies  
267 will be discussed and resolved before proceeding with title and abstract screening for the rest of  
268 the articles. AW will conduct the title and abstract screening of all articles, while co-researchers  
269 (QK) and an adolescent researcher will conduct title and abstract screening of 25% of articles to  
270 minimize the risk of bias. Where eligibility cannot be determined based on abstract, such articles  
271 will be labeled ambiguous and reviewed in full.

272 AW will conduct full-text screening and extract data from all eligible articles, while QK and an  
273 adolescent researcher will conduct full-text screening and data extraction for 10% of articles.  
274 Reasons for exclusion will be recorded for all excluded articles at this stage. Any discrepancies

275 or disagreements will be resolved through discussion among these three researchers and, if  
276 required, through discussion with a fourth researcher (KH).

277 Overlap in primary studies across multiple reviews can give undue weightage to studies included  
278 more than once in the synthesis of findings. It is recommended to address the risk of overlap at the  
279 inclusion, data extraction, or synthesis stage (100). We will assess the overlap in primary studies  
280 at the data extraction and synthesis stage by creating a citation matrix (93, 101) where the primary  
281 studies will be cross-linked with the reviews they are included in. The reviews will be listed in  
282 columns, and the primary studies will be added in rows, with a tick mark added under all reviews  
283 that include a primary study. The overlap will be quantified by calculating the corrected covered  
284 area measure (101) that indicates the degree of overlap. The citation matrix will help us ensure  
285 that the results of primary studies included in multiple reviews are only included once (100, 101).  
286 This citation matrix will be posted on the review's [OSF page](#).

### 287 **Data extraction**

288 Data from the included reviews will be extracted using a data extraction form designed in  
289 Covidence. The data extraction form will be piloted by researchers extracting the data, using 1%  
290 of eligible full-text articles. Inter-rater reliability between the researchers will be assessed using  
291 the kappa statistic. Data on results will be extracted only from the included reviews. Data will be  
292 extracted on:

- 293 **a)** Characteristics of eligible reviews including review title, names and contact details of study  
294 authors, publication type (e.g., article, conference abstract, report, etc.), review type  
295 (scoping, narrative, systematic, etc.), the age range of study population in the review, the  
296 condition under study (e.g., physical health, mental health, or specific disease/disorder),



1  
2  
3 297 aim of the review, definition of youth involvement used, search strategy, databases and  
4  
5 298 grey literature sources searched, search end date, method of synthesis, and tool used to  
6  
7  
8 299 appraise the risk of bias for the primary studies.  
9

10  
11 300 **b)** Characteristics of primary studies include their eligibility criteria, the number of primary  
12  
13 301 studies included in the review, the study design of primary studies, and the risk of bias  
14  
15 302 results for the primary studies.  
16  
17

18 303 **c)** Findings will consist of the use of different youth involvement strategies, level of youth  
19  
20 304 involvement, challenges, or barriers in the use of youth involvement strategies,  
21  
22 305 recommendations to address these barriers, best practices in youth involvement in health  
23  
24  
25 306 research, limitations of the review, and gaps identified in the literature.  
26  
27

### 28 307 **Risk of bias assessment**

29  
30  
31 308 A MeaSurement Tool to Assess systematic Reviews-2 (AMSTAR 2) (102) will be used to assess  
32  
33 309 the methodological quality of included systematic reviews. The risk of bias assessments conducted  
34  
35 310 for the primary studies in the included reviews will be narratively summarized. AW will conduct  
36  
37 311 the risk of bias assessment of all eligible systematic reviews, while a second reviewer will conduct  
38  
39 312 the risk of bias assessment for 10% of eligible systematic reviews. Any discrepancies or  
40  
41 313 disagreements will be resolved through discussion among these two researchers and, if required,  
42  
43 314 through discussion with a third researcher (KH).  
44  
45  
46  
47

### 48 315 **Narrative synthesis**

49  
50  
51 316 A narrative synthesis will be conducted to analyze the data. The first step will include  
52  
53 317 familiarization with the extracted data through close reading, followed by coding the extracted  
54  
55 318 data using deductive coding. Then, the codes will be structured under broader themes. Finally,  
56  
57  
58  
59  
60

1  
2  
3 319 these themes will be summarized in a descriptive and tabular form, centered around the research  
4  
5 320 questions.

### 8 321 **Patient and Public Involvement**

10 322 Adolescents will be involved in the title and abstract screening, full-text screening, data extraction,  
12 323 analysis, and dissemination phases of this umbrella review. These adolescents will be invited to  
14 324 participate through local non-profit organizations and/or academic institutions. Specifically, an  
16 325 adolescent co-researcher will be recruited to conduct title and abstract screening for 25% of the  
18 326 articles and undertake full-text screening and data extraction for 10% of articles to ensure the  
20 327 representation of youth in the decision-making process. Another youth co-researcher will  
22 328 contribute to the data analysis by developing themes and writing up the narrative synthesis with  
24 329 AW. To increase the relevance of the findings, 6-8 members of a youth advisory group will be  
26 330 invited to share their interpretation of the results and reflections on the challenges and  
28 331 recommendations highlighted in the literature. Additionally, they will contribute by reviewing the  
30 332 outputs of this umbrella review and ensuring the language used is accessible and inclusive. We  
32 333 will also facilitate the young co-researchers and advisors to present the findings to the scientific  
34 334 community via video abstracts and to youth and lay audiences through dissemination methods  
36 335 determined by the youth themselves to ensure more effective and wider dissemination of the  
38 336 results.

### 46 337 **Discussion**

48 338 This review will bring together evidence on the most effective ways of involving adolescents in  
50 339 health research, challenges experienced in this process, and mitigation strategies which have been  
52 340 recommended to address or prevent these challenges. These findings will inform the development  
54 341 of guidelines on involving adolescents in health research. The need for a comprehensive set of

1  
2  
3 342 guidelines and resources on involving adolescents in health research has been highlighted by youth  
4  
5 343 researchers (80) and studies (82, 103-106). These guidelines will facilitate researchers to  
6  
7 344 collaborate with adolescents more effectively, leading to more meaningful involvement of  
8  
9 345 adolescents in research.

10  
11  
12 346 This umbrella review has a few limitations. The search for eligible reviews will be restricted to the  
13  
14 347 English language. Additionally, while the search strategy incorporates a wide range of terms to  
15  
16 348 account for the variation in terminology around youth involvement, there is a possibility that  
17  
18 349 relevant reviews indexed using different terms will not be included. Moreover, umbrella reviews  
19  
20 350 are based on the information presented in the review articles and are therefore limited by the quality  
21  
22 351 of extracted data in the included reviews. Finally, there is a possibility of missing relevant data on  
23  
24 352 youth involvement in health research that has not previously been included in reviews. Any  
25  
26 353 deviations to the submitted protocol will be documented as amendments to the PROSPERO  
27  
28 354 registration.

29  
30  
31 355 **Ethics and dissemination:** Only reviews will be included in this umbrella review; therefore, ethical  
32  
33 356 approval is not required. The findings of this umbrella review will be disseminated through peer-  
34  
35 357 reviewed publications, participatory workshops, and academic conferences.

### 36 358 **Supplementary Information**

37 359 Additional file 1. PRISMA-P Checklist.

38 360 Additional file 2. Search strategy for MEDLINE

39 361 Additional file 3. Search strategy for Web of Science

### 40 362 **Competing interests**

41 363 The authors declare that they have no competing interests.

### 42 364 **Funding statement**

1  
2  
3 365 Azza Warraitch received the Ussher Fellowship from Trinity College Dublin to support her PhD  
4  
5 366 research, including this umbrella review. She received a Trinity Research in Social Sciences  
6  
7 367 (TRiSS) Research Fellowship to conduct participatory workshops with youth as part of this  
8  
9  
10 368 umbrella review. The funders did not play any role in design of this review.

### 11 369 **Authors' contributions**

12  
13  
14 370 AW and KH conceptualized and wrote the protocol with valuable inputs from QK. DB, ML, PC  
15  
16 371 will contribute to the screening, data extraction and analysis of this review as young co-researchers.  
17  
18  
19 372 All authors have reviewed and approved the final manuscript.

### 20 373 **Acknowledgments**

21  
22  
23 374 We would like to acknowledge all members of the Trinity Centre for Global Health and School of  
24  
25 375 Psychology – especially Drs. Sadhbh Byrne, Frédérique Vallieres and Elizabeth Nixon – for their  
26  
27 376 valuable inputs. We would also like to thank Ms. Geraldine Fitzgerald, the research librarian at the  
28  
29 377 School of Medicine, Trinity College Dublin, for her feedback and input on the search strategy for  
30  
31 378 this umbrella review.  
32  
33  
34  
35  
36  
37  
38  
39  
40  
41  
42  
43  
44  
45  
46  
47  
48  
49  
50  
51  
52  
53  
54  
55  
56  
57  
58  
59  
60

379 **References**

- 380 1. Nations U. Department of Economic and Social Affairs, Population Division. World  
381 Population Prospects 2019: Data Booklet (ST/ESA/SER. A/424).
- 382 2. Dick B, Ferguson BJ. Health for the world's adolescents: a second chance in the second  
383 decade. *Journal of Adolescent Health*. 2015;56(1):3-6.
- 384 3. Patton GC, Sawyer SM, Santelli JS, Ross DA, Afifi R, Allen NB, et al. Our future: a Lancet  
385 commission on adolescent health and wellbeing. *The Lancet*. 2016;387(10036):2423-78.
- 386 4. Kuruvilla S, Bustreo F, Kuo T, Mishra C, Taylor K, Fogstad H, et al. The Global strategy  
387 for women's, children's and adolescents' health (2016–2030): a roadmap based on evidence and  
388 country experience. *Bulletin of the World Health Organization*. 2016;94(5):398.
- 389 5. Temmerman M, Khosla R, Bhutta ZA, Bustreo F. Towards a new global strategy for  
390 women's, children's and adolescents' health. *bmj*. 2015;351.
- 391 6. Organization WH. Global accelerated action for the health of adolescents ( AA-HA!):  
392 guidance to support country implementation. 2017.
- 393 7. WHO. Global health estimates 2015: DALYs by cause, age, sex, by country and by region,  
394 2000-2015 Geneva. 2016 [Available from:  
395 [http://www.who.int/healthinfo/global\\_burden\\_disease/estimates/en/index2.html](http://www.who.int/healthinfo/global_burden_disease/estimates/en/index2.html).
- 396 8. Resnick MD, Catalano RF, Sawyer SM, Viner R, Patton GC. Seizing the opportunities of  
397 adolescent health. *The Lancet*. 2012;379(9826):1564-7.
- 398 9. Sawyer SM, Afifi RA, Bearinger LH, Blakemore S-J, Dick B, Ezech AC, et al. Adolescence:  
399 a foundation for future health. *The lancet*. 2012;379(9826):1630-40.
- 400 10. Gribble JN, Bremner J. The challenge of attaining the demographic dividend: Population  
401 Reference Bureau; 2012.
- 402 11. Deogan C, Ferguson J, Stenberg K. Resource needs for adolescent friendly health services:  
403 estimates for 74 low-and middle-income countries. *PLoS One*. 2012;7(12):e51420.
- 404 12. Stenberg K, Axelson H, Sheehan P, Anderson I, Gülmezoglu AM, Temmerman M, et al.  
405 Advancing social and economic development by investing in women's and children's health: a new  
406 Global Investment Framework. *The Lancet*. 2014;383(9925):1333-54.
- 407 13. Curtain R. The case for investing in young people as part of a national poverty reduction  
408 strategy. Paper commissioned by the United Nations Population Fund, New York. 2004.
- 409 14. Salam RA, Das JK, Lassi ZS, Bhutta ZA. Adolescent health and well-being: Background  
410 and methodology for review of potential interventions. *Journal of adolescent health*.  
411 2016;59(4):S4-S10.
- 412 15. Li Z, Li M, Patton GC, Lu C. Global development assistance for adolescent health from  
413 2003 to 2015. *JAMA network open*. 2018;1(4):e181072-e.
- 414 16. Unicef. Convention on the Rights of the Child. 1989.
- 415 17. Sellars E, Pavarini G, Michelson D, Creswell C, Fazel M. Young people's advisory groups  
416 in health research: scoping review and mapping of practices. *Archives of Disease in Childhood*.  
417 2021;106(7):698-704.
- 418 18. Authority NHR. What is public involvement in research? 2020 [Available from:  
419 <https://www.hra.nhs.uk/planning-and-improving-research/best-practice/public-involvement/>.
- 420 19. Wilson O, Daxenberger L, Dieudonne L, Eustace J, Hanard A, Krishnamurthi A, et al. A  
421 rapid evidence review of young people's involvement in health research. London: Wellcome.  
422 2020:3.

- 423 20. Oliveras C, Cluver L, Bernays S, Armstrong A. Nothing about us without RIGHTS—  
424 meaningful engagement of children and youth: from research prioritization to clinical trials,  
425 implementation science, and policy. *Journal of acquired immune deficiency syndromes (1999)*.  
426 2018;78(1):S27.
- 427 21. Pavarini G, Lorimer J, Manzini A, Goundrey-Smith E, Singh I. Co-producing research with  
428 youth: The NeurOx young people's advisory group model. *Health Expectations*. 2019;22(4):743-  
429 51.
- 430 22. Kirby P. A guide to actively involving young people in research. For Researchers, Research  
431 Commissioners and Managers, Involve Support Unit, Eastleigh, Hampshire. 2004.
- 432 23. Ozer EJ, Piatt AA. Adolescent Participation in Research: Innovation, rationale and next  
433 steps. 2017.
- 434 24. NIHR. Involving children and young people as advisors in research. Top tips and essential  
435 key issues for researchers. 2021.
- 436 25. Hart RA. Children's participation: From tokenism to citizenship. 1992.
- 437 26. Shier H. Pathways to participation: Openings, opportunities and obligations. *Children &*  
438 *society*. 2001;15(2):107-17.
- 439 27. Fund StC, Treseder P. Empowering Children and Young People: A Training Manual:  
440 Promoting Involvement in Decision-making: Save the Children Fund; 1997.
- 441 28. Wong NT, Zimmerman MA, Parker EA. A typology of youth participation and  
442 empowerment for child and adolescent health promotion. *American journal of community*  
443 *psychology*. 2010;46(1):100-14.
- 444 29. Arunkumar K, Bowman DD, Coen SE, El-Bagdady MA, Ergler CR, Gilliland JA, et al.  
445 Conceptualizing youth participation in children's health research: insights from a youth-driven  
446 process for developing a youth advisory council. *Children*. 2019;6(1):3.
- 447 30. Clarke S. A "Child's rights perspective": the "right" of children and young people to  
448 participate in health care research. *Issues in comprehensive pediatric nursing*. 2015;38(3):161-80.
- 449 31. Daly W. "Adding their flavour to the mix": involving children and young people in care in  
450 research design. *Australian Social Work*. 2009;62(4):460-75.
- 451 32. Nygren JM, Lindberg S, Wärnestål P, Svedberg P. Involving children with cancer in health  
452 promotive research: a case study describing why, what, and how. *JMIR research protocols*.  
453 2017;6(2):e7094.
- 454 33. Gibson F. Building a culture of participation: young people's involvement in research.  
455 *Cancer Care for Adolescents and Young Adults* Oxford: Blackwell Publishing. 2008:214-28.
- 456 34. Kellett M. Children as active researchers: a new paradigm for the 21st century. National  
457 Centre for Research Methods Review Papers NCRM/003, ESRC National Centre for Research  
458 Methods. 2005.
- 459 35. Jacquez F, Vaughn LM, Wagner E. Youth as partners, participants or passive recipients: A  
460 review of children and adolescents in community-based participatory research (CBPR). *American*  
461 *journal of community psychology*. 2013;51(1-2):176-89.
- 462 36. Telford R, Boote JD, Cooper CL. What does it mean to involve consumers successfully in  
463 NHS research? A consensus study. *Health Expectations*. 2004;7(3):209-20.
- 464 37. Health Do. Strengthening Accountability: Involving Patients and the Public. Policy  
465 Guidance, Section 11 of the Health and Social Care Act 2001. Department of Health London;  
466 2001.

- 1  
2  
3 467 38. Smith E, Ross F, Donovan S, Manthorpe J, Brearley S, Sitzia J, et al. User involvement in  
4 468 the design and undertaking of nursing, midwifery and health visiting research. Nursing Research  
5 469 Unit, King's College London. 2005.
- 7 470 39. Hanley B, Bradburn J, Gorin S, Barnes M, Evans C, Goodare H, et al. Involving consumers  
8 471 in research & development in the NHS: briefing notes for researchers: Consumers in NHS  
9 472 Research Support Unit Winchester; 2000.
- 11 473 40. Health Do. Patient and public involvement in the new NHS: The Stationery Office London;  
12 474 1999.
- 13 475 41. Health GBD. Listening, hearing and responding Department of Health Action Plan: core  
14 476 principles for the involvement of children and young people. 2002.
- 15 477 42. Watch HR. 25th anniversary of the convention on the rights of the Child. 2017.
- 16 478 43. Partnership for Maternal NaCHIYAfFP, and Family Planning. Global consensus statement  
17 479 on meaningful adolescent and youth engagement. 2020 [Available from:  
18 480 <https://www.who.int/pmnch/mye-statement.pdf?ua=1>].
- 19 481 44. Bulc B, Al-Wahdani B, Bustreo F, Choonara S, Demaio A, Jácome DI, et al. Urgency for  
20 482 transformation: youth engagement in global health. *The Lancet Global Health*. 2019;7(7):e839-  
21 483 e40.
- 23 484 45. Nations U. Youth2030: The United Nations Strategy on Youth 2018 [Available from:  
24 485 <https://www.un.org/youthenvoy/youth-un/>].
- 25 486 46. Valdez ES, Skobic I, Valdez L, O Garcia D, Korchmaros J, Stevens S, et al. Youth  
26 487 participatory action research for youth substance use prevention: a systematic review. *Substance*  
27 488 *use & misuse*. 2020;55(2):314-28.
- 29 489 47. Rouncefield-Swales A, Harris J, Carter B, Bray L, Bewley T, Martin R. Children and  
30 490 young people's contributions to public involvement and engagement activities in health-related  
31 491 research: A scoping review. *PLoS ONE*. 2021;16(6):e0252774.
- 32 492 48. Denison JA, Pettifor A, Mofenson LM, Kasedde S, Marcus R, Konayuma KJ, et al. Youth  
33 493 engagement in developing an implementation science research agenda on adolescent HIV testing  
34 494 and care linkages in sub-Saharan Africa. *AIDS (London, England)*. 2017;31(Suppl 3):S195.
- 35 495 49. Gaillard S, Malik S, Preston J, Escalera BN, Dicks P, Touil N, et al. Involving children and  
36 496 young people in clinical research through the forum of a European Young Persons' Advisory  
37 497 Group: needs and challenges. *Fundamental & clinical pharmacology*. 2018;32(4):357-62.
- 39 498 50. Kulbok PA, Meszaros PS, Bond DC, Thatcher E, Park E, Kimbrell M, et al. Youths as  
40 499 partners in a community participatory project for substance use prevention. *Family & community*  
41 500 *health*. 2015;38(1):3-11.
- 42 501 51. Tsang VW, West L, Woods C, Koh CJ, McCune S, Mullin T, et al. Role of patients and  
43 502 parents in pediatric drug development. *Therapeutic innovation & regulatory science*.  
44 503 2019;53(5):601-8.
- 46 504 52. Comfort M, Raymond-Flesch M, Auerswald C, McGlone L, Chavez M, Minnis A.  
47 505 Community-engaged research with rural Latino adolescents: Design and implementation strategies  
48 506 to study the social determinants of health. *Gateways: international journal of community research*  
49 507 *& engagement*. 2018;11(1):90.
- 50 508 53. Vaughn LM, Wagner E, Jacquez F. A review of community-based participatory research  
51 509 in child health. *MCN: The American journal of maternal/child nursing*. 2013;38(1):48-53.
- 53 510 54. Valdez ES, Korchmaros J, Sabo S, Garcia DO, Carvajal S, Stevens S. How the US-Mexico  
54 511 border influences adolescent substance use: Youth participatory action research using photovoice.  
55 512 *International Journal of Drug Policy*. 2019;73:146-55.

- 1  
2  
3 513 55. Jardine CG, James A. Youth researching youth: Benefits, limitations and ethical  
4 514 considerations within a participatory research process. *International Journal of Circumpolar*  
5 515 *Health*. 2012;71(1):18415.
- 6 516 56. Bird D, Culley L, Lakhanpaul M. Why collaborate with children in health research: an  
7 517 analysis of the risks and benefits of collaboration with children. *Archives of Disease in Childhood-*  
8 518 *Education and Practice*. 2013;98(2):42-8.
- 9 519 57. Kelly B, Friel S, McShane T, Pinkerton J, Gilligan E. "I haven't read it, I've lived it!" The  
10 520 benefits and challenges of peer research with young people leaving care. *Qualitative Social Work*.  
11 521 2020;19(1):108-24.
- 12 522 58. Panter-Brick C, Eggerman M, Ager A, Hadfield K, Dajani R. Measuring the psychosocial,  
13 523 biological, and cognitive signatures of profound stress in humanitarian settings: impacts,  
14 524 challenges, and strategies in the field. *Conflict and health*. 2020;14(1):1-7.
- 15 525 59. Delman J. Participatory Action Research and young adults with psychiatric disabilities.  
16 526 *Psychiatric Rehabilitation Journal*. 2012;35(3):231.
- 17 527 60. Chappell P, Rule P, Dlamini M, Nkala N. Troubling power dynamics: youth with  
18 528 disabilities as co-researchers in sexuality research in South Africa. *Childhood*. 2014;21(3):385-99.
- 19 529 61. Mitchell K, Durante SE, Pellatt K, Richardson CG, Mathias S, Buxton JA. Naloxone and  
20 530 the Inner City Youth Experience (NICYE): a community-based participatory research study  
21 531 examining young people's perceptions of the BC take home naloxone program. *Harm reduction*  
22 532 *journal*. 2017;14(1):1-8.
- 23 533 62. Shamrova DP, Cummings CE. Participatory action research (PAR) with children and  
24 534 youth: An integrative review of methodology and PAR outcomes for participants, organizations,  
25 535 and communities. *Children and Youth Services Review*. 2017;81:400-12.
- 26 536 63. Anyon Y, Bender K, Kennedy H, Dechants J. A systematic review of youth participatory  
27 537 action research (YPAR) in the United States: Methodologies, youth outcomes, and future  
28 538 directions. *Health Education & Behavior*. 2018;45(6):865-78.
- 29 539 64. BAILEY S, BODDY K, Briscoe S, Morris C. Involving disabled children and young people  
30 540 as partners in research: a systematic review. *Child: care, health and development*. 2015;41(4):505-  
31 541 14.
- 32 542 65. Brosnan CA, Upchurch SL, Meininger JC, Hester LE, Johnson G, Eissa MA. Student  
33 543 nurses participate in public health research and practice through a school-based screening program.  
34 544 *Public Health Nursing*. 2005;22(3):260-6.
- 35 545 66. Capanec D, Clarke D, Plohman J, Gerard J. Engaging undergraduate nursing students in  
36 546 research: The students' experience of a summer internship program pilot project. *Journal of*  
37 547 *Nursing Education*. 2013;52(8):466-9.
- 38 548 67. Suleiman AB, Soleimanpour S, London J. Youth action for health through youth-led  
39 549 research. *J Community Pract*. 2006;14(1-2):125-45.
- 40 550 68. Lindquist-Grantz R, Abraczinskas M. Using youth participatory action research as a health  
41 551 intervention in community settings. *Health promotion practice*. 2020;21(4):573-81.
- 42 552 69. Abma T, Lips S, Schrijver J. Sowing seeds to harvest healthier adults: The working  
43 553 principles and impact of participatory health research with children in a primary school context.  
44 554 *International journal of environmental research and public health*. 2020;17(2):451.
- 45 555 70. Aceves-Martins M, Aleman-Diaz AY, Giral M, Solà R. Involving young people in health  
46 556 promotion, research and policy-making: practical recommendations. *International Journal for*  
47 557 *Quality in Health Care*. 2019;31(2):147-53.



- 1  
2  
3 558 71. Lane HG, Porter KJ, Hecht E, Harris P, Zoellner JM. A participatory process to engage  
4 559 Appalachian youth in reducing sugar-sweetened beverage consumption. *Health promotion*  
5 560 *practice*. 2019;20(2):258-68.
- 6 561 72. Sherman SG, Sutcliffe C, Srirojn B, Latkin CA, Aramratanna A, Celentano DD. Evaluation  
7 562 of a peer network intervention trial among young methamphetamine users in Chiang Mai,  
8 563 Thailand. *Social science & medicine*. 2009;68(1):69-79.
- 9 564 73. Mance GA, Mendelson T, Byrd III B, Jones J, Tandon D. Utilizing community-based  
10 565 participatory research to adapt a mental health intervention for African American emerging adults.  
11 566 *Progress in community health partnerships: research, education, and action*. 2010;4(2):131-40.
- 12 567 74. Stewart K-A, Brown SL, Wrensford G, Hurley MM. Creating a comprehensive approach  
13 568 to exposing underrepresented pre-health professions students to clinical medicine and health  
14 569 research. *J Natl Med Assoc*. 2020;112(1):36-43.
- 15 570 75. Sheridan R, Preston J, Stones S, Ainsworth S, Horton-Taylor D, Challinor R, et al. Patient  
16 571 and public involvement in a study of multimedia clinical trial information for children, young  
17 572 people and families. *Research for All*. 2020:47-65.
- 18 573 76. Davies A, Mwangome N, Yeri B, Mwangi G, Mumba N, Marsh V, et al. Evolution of a  
19 574 programme to engage school students with health research and science in Kenya. *Wellcome open*  
20 575 *research*. 2019;4.
- 21 576 77. Dennis Jr SF, Gaulocher S, Carpiano RM, Brown D. Participatory photo mapping (PPM):  
22 577 Exploring an integrated method for health and place research with young people. *Health & place*.  
23 578 2009;15(2):466-73.
- 24 579 78. Findholt NE, Michael YL, Davis MM. Photovoice engages rural youth in childhood obesity  
25 580 prevention. *Public Health Nursing*. 2011;28(2):186-92.
- 26 581 79. Masuku B, Mkhwanazi N, Young E, Koch A, Warner D. Beyond the lab: Eh! woza and  
27 582 knowing tuberculosis. *Medical Humanities*. 2018;44(4):285-92.
- 28 583 80. Das S, Daxenberger L, Dieudonne L, Eustace J, Hanard A, Krishnamurthi A, et al.  
29 584 Stakeholder consultation on involving young people in health research. London: Wellcome.  
30 585 2020:3.
- 31 586 81. Kendal SE, Milnes L, Welsby H, Prymachuk S, Group CR, Shafeeah C, et al. Prioritizing  
32 587 young people's emotional health support needs via participatory research. *Journal of psychiatric*  
33 588 *and mental health nursing*. 2017;24(5):263-71.
- 34 589 82. Wadman R, Williams AJ, Brown K, Nielsen E. Supported and valued? A survey of early  
35 590 career researchers' experiences and perceptions of youth and adult involvement in mental health,  
36 591 self-harm and suicide research. *Research involvement and engagement*. 2019;5(1):1-12.
- 37 592 83. Bradbury-Jones C, Taylor J. Engaging with children as co-researchers: challenges,  
38 593 counter-challenges and solutions. *International Journal of Social Research Methodology*.  
39 594 2015;18(2):161-73.
- 40 595 84. Franklin A, Sloper P. Listening and responding? Children's participation in health care  
41 596 within England. *Children's Health and Children's rights: Brill Nijhoff*; 2006. p. 11-29.
- 42 597 85. Hawke LD, Darnay K, Relihan J, Khaleghi-Moghaddam M, Barbic S, Lachance L, et al.  
43 598 Enhancing researcher capacity to engage youth in research: Researchers' engagement experiences,  
44 599 barriers and capacity development priorities. *Health Expectations*. 2020;23(3):584-92.
- 45 600 86. McCartan C, Burns S, Schubotz D. Recruitment and capacity-building challenges in  
46 601 participatory research involving young people in Northern Ireland. *Community Research for*  
47 602 *Participation: From theory to method*. 2012:283.

- 1  
2  
3 603 87. Mitchell SJ, Slowther AM, Coad J, Akhtar S, Hyde E, Khan D, et al. Ethics and patient  
4 604 and public involvement with children and young people. *Archives of Disease in Childhood:*  
5 605 *Education and Practice Edition.* 2019;104(4):200.
- 6 606 88. Morton KL, Atkin AJ, Corder K, Suhrcke M, Turner D, Van Sluijs EMF. Engaging  
7 607 stakeholders and target groups in prioritising a public health intervention: The Creating Active  
8 608 School Environments (CASE) online Delphi study. *BMJ Open.* 2017;7(1).
- 9 609 89. James RD, McGlone West K, Madrid TM. Launching native health leaders: Reducing  
10 610 mistrust of research through student peer mentorship. *American journal of public health.*  
11 611 2013;103(12):2215-9.
- 12 612 90. Peek L, Tobin-Gurley J, Cox RS, Scannell L, Fletcher S, Heykoop C. Engaging youth in  
13 613 post-disaster research: Lessons learned from a creative methods approach. *Gateways: International*  
14 614 *Journal of Community Research and Engagement.* 2016;9(1):89-112.
- 15 615 91. Huang X, O'Connor M, Ke L-S, Lee S. Ethical and methodological issues in qualitative  
16 616 health research involving children: A systematic review. *Nursing ethics.* 2016;23(3):339-56.
- 17 617 92. Pollock M, Fernandes RM, Becker LA, Pieper D, Hartling L. Chapter V: overviews of  
18 618 reviews. *Cochrane Handbook for systematic reviews of interventions version.* 2020;6.
- 19 619 93. Pollock M, Fernandes RM, Becker LA, Pieper D, Hartling L. Chapter V: overviews of  
20 620 reviews. *Cochrane Handbook for systematic reviews of interventions version.* 2018;6.
- 21 621 94. Shamseer L, Moher D, Clarke M, Ghersi D, Liberati A, Petticrew M, et al. Preferred  
22 622 reporting items for systematic review and meta-analysis protocols (PRISMA-P) 2015: elaboration  
23 623 and explanation. *Bmj.* 2015;349.
- 24 624 95. Pollock M, Fernandes RM, Pieper D, Tricco AC, Gates M, Gates A, et al. Preferred  
25 625 Reporting Items for Overviews of Reviews (PRIOR): a protocol for development of a reporting  
26 626 guideline for overviews of reviews of healthcare interventions. *Systematic reviews.* 2019;8(1):1-  
27 627 9.
- 28 628 96. Sawyer SM, Azzopardi PS, Wickremarathne D, Patton GC. The age of adolescence. *The*  
29 629 *Lancet Child & Adolescent Health.* 2018;2(3):223-8.
- 30 630 97. Godin K, Stapleton J, Kirkpatrick SI, Hanning RM, Leatherdale ST. Applying systematic  
31 631 review search methods to the grey literature: a case study examining guidelines for school-based  
32 632 breakfast programs in Canada. *Systematic reviews.* 2015;4(1):1-10.
- 33 633 98. Grant MJ, Booth A. A typology of reviews: an analysis of 14 review types and associated  
34 634 methodologies. *Health information & libraries journal.* 2009;26(2):91-108.
- 35 635 99. Fennelly O, Cunningham C, Grogan L, Cronin H, O'Shea C, Roche M, et al. Successfully  
36 636 implementing a national electronic health record: a rapid umbrella review. *Int J Med Informatics.*  
37 637 2020;144:104281.
- 38 638 100. Lunny C, Pieper D, Thabet P, Kanji S. Managing Overlap of Primary Studies Results  
39 639 Across Systematic Reviews: Practical Considerations for Authors of Overviews of Reviews. 2021.
- 40 640 101. Pieper D, Antoine S-L, Mathes T, Neugebauer EA, Eikermann M. Systematic review finds  
41 641 overlapping reviews were not mentioned in every other overview. *Journal of clinical*  
42 642 *epidemiology.* 2014;67(4):368-75.
- 43 643 102. Shea BJ, Reeves BC, Wells G, Thuku M, Hamel C, Moran J, et al. AMSTAR 2: a critical  
44 644 appraisal tool for systematic reviews that include randomised or non-randomised studies of  
45 645 healthcare interventions, or both. *bmj.* 2017;358.
- 46 646 103. Flynn R, Walton S, Scott SD. Engaging children and families in pediatric health research:  
47 647 a scoping review. *Research involvement and engagement.* 2019;5(1):1-8.

- 1  
2  
3 648 104. Faithfull S, Brophy L, Pennell K, Simmons MB. Barriers and enablers to meaningful youth  
4 649 participation in mental health research: qualitative interviews with youth mental health  
5 650 researchers. *Journal of Mental Health*. 2019;28(1):56-63.  
6 651 105. Postma L, Luchtenberg ML, Verhagen AE, Maeckelberghe EL. The attitudes of healthy  
7 652 children and researchers towards the challenges of involving children in research: an exploratory  
8 653 study. *Research involvement and engagement*. 2021;7(1):1-10.  
9 654 106. Chan W, Thurairajah P, Butcher N, Oosterwijk C, Wever K, Eichler I, et al. Guidance on  
10 655 development and operation of Young Persons' Advisory Groups. *Archives of disease in childhood*.  
11 656 2020;105(9):875-80.  
12  
13  
14 657  
15  
16  
17  
18  
19  
20  
21  
22  
23  
24  
25  
26  
27  
28  
29  
30  
31  
32  
33  
34  
35  
36  
37  
38  
39  
40  
41  
42  
43  
44  
45  
46  
47  
48  
49  
50  
51  
52  
53  
54  
55  
56  
57  
58  
59  
60

For peer review only

## PRISMA-P 2015 Checklist

This checklist has been adapted for use with systematic review protocol submissions to BioMed Central journals from Table 3 in Moher D et al: Preferred reporting items for systematic review and meta-analysis protocols (PRISMA-P) 2015 statement. *Systematic Reviews* 2015 4:1

An Editorial from the Editors-in-Chief of *Systematic Reviews* details why this checklist was adapted - Moher D, Stewart L & Shekelle P: Implementing PRISMA-P: recommendations for prospective authors. *Systematic Reviews* 2016 5:15

| Section/topic                     | #  | Checklist item                                                                                                                                                                                  | Information reported                |                                     | Line number(s)     |
|-----------------------------------|----|-------------------------------------------------------------------------------------------------------------------------------------------------------------------------------------------------|-------------------------------------|-------------------------------------|--------------------|
|                                   |    |                                                                                                                                                                                                 | Yes                                 | No                                  |                    |
| <b>ADMINISTRATIVE INFORMATION</b> |    |                                                                                                                                                                                                 |                                     |                                     |                    |
| <b>Title</b>                      |    |                                                                                                                                                                                                 |                                     |                                     |                    |
| Identification                    | 1a | Identify the report as a protocol of a systematic review                                                                                                                                        | <input checked="" type="checkbox"/> | <input type="checkbox"/>            | 1-2                |
| Update                            | 1b | If the protocol is for an update of a previous systematic review, identify as such                                                                                                              | <input type="checkbox"/>            | <input checked="" type="checkbox"/> |                    |
| <b>Registration</b>               | 2  | If registered, provide the name of the registry (e.g., PROSPERO) and registration number in the Abstract                                                                                        | <input checked="" type="checkbox"/> | <input type="checkbox"/>            | 37                 |
| <b>Authors</b>                    |    |                                                                                                                                                                                                 |                                     |                                     |                    |
| Contact                           | 3a | Provide name, institutional affiliation, and e-mail address of all protocol authors; provide physical mailing address of corresponding author                                                   | <input checked="" type="checkbox"/> | <input type="checkbox"/>            | 6-12               |
| Contributions                     | 3b | Describe contributions of protocol authors and identify the guarantor of the review                                                                                                             | <input checked="" type="checkbox"/> | <input type="checkbox"/>            | 368-371            |
| <b>Amendments</b>                 | 4  | If the protocol represents an amendment of a previously completed or published protocol, identify as such and list changes; otherwise, state plan for documenting important protocol amendments | <input type="checkbox"/>            | <input checked="" type="checkbox"/> |                    |
| <b>Support</b>                    |    |                                                                                                                                                                                                 |                                     |                                     |                    |
| Sources                           | 5a | Indicate sources of financial or other support for the review                                                                                                                                   | <input checked="" type="checkbox"/> | <input type="checkbox"/>            | 363-367<br>372-377 |
| Sponsor                           | 5b | Provide name for the review funder and/or sponsor                                                                                                                                               | <input checked="" type="checkbox"/> | <input type="checkbox"/>            | 363-367            |
| Role of sponsor/funder            | 5c | Describe roles of funder(s), sponsor(s), and/or institution(s), if any, in developing the protocol                                                                                              | <input checked="" type="checkbox"/> | <input type="checkbox"/>            | 367                |
| <b>INTRODUCTION</b>               |    |                                                                                                                                                                                                 |                                     |                                     |                    |

| Section/topic                             | #   | Checklist item                                                                                                                                                                                                                              | Information reported                |                                     | Line number(s)               |
|-------------------------------------------|-----|---------------------------------------------------------------------------------------------------------------------------------------------------------------------------------------------------------------------------------------------|-------------------------------------|-------------------------------------|------------------------------|
|                                           |     |                                                                                                                                                                                                                                             | Yes                                 | No                                  |                              |
| <b>Rationale</b>                          | 6   | Describe the rationale for the review in the context of what is already known                                                                                                                                                               | <input checked="" type="checkbox"/> | <input type="checkbox"/>            | 48-142                       |
| <b>Objectives</b>                         | 7   | Provide an explicit statement of the question(s) the review will address with reference to participants, interventions, comparators, and outcomes (PICO)                                                                                    | <input checked="" type="checkbox"/> | <input type="checkbox"/>            | 143-147                      |
| <b>METHODS</b>                            |     |                                                                                                                                                                                                                                             |                                     |                                     |                              |
| <b>Eligibility criteria</b>               | 8   | Specify the study characteristics (e.g., PICO, study design, setting, time frame) and report characteristics (e.g., years considered, language, publication status) to be used as criteria for eligibility for the review                   | <input checked="" type="checkbox"/> | <input type="checkbox"/>            | 223-260                      |
| <b>Information sources</b>                | 9   | Describe all intended information sources (e.g., electronic databases, contact with study authors, trial registers, or other grey literature sources) with planned dates of coverage                                                        | <input checked="" type="checkbox"/> | <input type="checkbox"/>            | 172-217                      |
| <b>Search strategy</b>                    | 10  | Present draft of search strategy to be used for at least one electronic database, including planned limits, such that it could be repeated                                                                                                  | <input checked="" type="checkbox"/> | <input type="checkbox"/>            | 160-171<br>Additional file 2 |
| <b>STUDY RECORDS</b>                      |     |                                                                                                                                                                                                                                             |                                     |                                     |                              |
| Data management                           | 11a | Describe the mechanism(s) that will be used to manage records and data throughout the review                                                                                                                                                | <input checked="" type="checkbox"/> | <input type="checkbox"/>            | 218-222                      |
| Selection process                         | 11b | State the process that will be used for selecting studies (e.g., two independent reviewers) through each phase of the review (i.e., screening, eligibility, and inclusion in meta-analysis)                                                 | <input checked="" type="checkbox"/> | <input type="checkbox"/>            | 261-286                      |
| Data collection process                   | 11c | Describe planned method of extracting data from reports (e.g., piloting forms, done independently, in duplicate), any processes for obtaining and confirming data from investigators                                                        | <input checked="" type="checkbox"/> | <input type="checkbox"/>            | 287-306                      |
| <b>Data items</b>                         | 12  | List and define all variables for which data will be sought (e.g., PICO items, funding sources), any pre-planned data assumptions and simplifications                                                                                       | <input checked="" type="checkbox"/> | <input type="checkbox"/>            | 287-306                      |
| <b>Outcomes and prioritization</b>        | 13  | List and define all outcomes for which data will be sought, including prioritization of main and additional outcomes, with rationale                                                                                                        | <input checked="" type="checkbox"/> | <input type="checkbox"/>            | 287-306                      |
| <b>Risk of bias in individual studies</b> | 14  | Describe anticipated methods for assessing risk of bias of individual studies, including whether this will be done at the outcome or study level, or both; state how this information will be used in data synthesis                        | <input checked="" type="checkbox"/> | <input type="checkbox"/>            | 307-314                      |
| <b>DATA</b>                               |     |                                                                                                                                                                                                                                             |                                     |                                     |                              |
| <b>Synthesis</b>                          | 15a | Describe criteria under which study data will be quantitatively synthesized                                                                                                                                                                 | <input type="checkbox"/>            | <input checked="" type="checkbox"/> |                              |
|                                           | 15b | If data are appropriate for quantitative synthesis, describe planned summary measures, methods of handling data, and methods of combining data from studies, including any planned exploration of consistency (e.g., $I^2$ , Kendall's tau) | <input type="checkbox"/>            | <input checked="" type="checkbox"/> |                              |
|                                           | 15c | Describe any proposed additional analyses (e.g., sensitivity or subgroup analyses, meta-regression)                                                                                                                                         | <input type="checkbox"/>            | <input checked="" type="checkbox"/> |                              |

| Section/topic                            | #   | Checklist item                                                                                                              | Information reported                |                                     | Line number(s) |
|------------------------------------------|-----|-----------------------------------------------------------------------------------------------------------------------------|-------------------------------------|-------------------------------------|----------------|
|                                          |     |                                                                                                                             | Yes                                 | No                                  |                |
|                                          | 15d | If quantitative synthesis is not appropriate, describe the type of summary planned                                          | <input checked="" type="checkbox"/> | <input type="checkbox"/>            | 315-320        |
| <b>Meta-bias(es)</b>                     | 16  | Specify any planned assessment of meta-bias(es) (e.g., publication bias across studies, selective reporting within studies) | <input type="checkbox"/>            | <input checked="" type="checkbox"/> |                |
| <b>Confidence in cumulative evidence</b> | 17  | Describe how the strength of the body of evidence will be assessed (e.g., GRADE)                                            | <input type="checkbox"/>            | <input checked="" type="checkbox"/> |                |

For peer review only

## Search strategy for MEDLINE

| #   | Query                                                                                                                                                                                                                                                                                                                                                                                                                                                                                                                                                                                                                                                                                                                                         | Limiters/Expanders                                                     |
|-----|-----------------------------------------------------------------------------------------------------------------------------------------------------------------------------------------------------------------------------------------------------------------------------------------------------------------------------------------------------------------------------------------------------------------------------------------------------------------------------------------------------------------------------------------------------------------------------------------------------------------------------------------------------------------------------------------------------------------------------------------------|------------------------------------------------------------------------|
| S17 | S3 AND S8 AND S15 AND S16                                                                                                                                                                                                                                                                                                                                                                                                                                                                                                                                                                                                                                                                                                                     | Expanders - Apply equivalent subjects<br>Search modes - Boolean/Phrase |
| S16 | AB review OR TI review                                                                                                                                                                                                                                                                                                                                                                                                                                                                                                                                                                                                                                                                                                                        | Expanders - Apply equivalent subjects<br>Search modes - Boolean/Phrase |
| S15 | S13 OR S14                                                                                                                                                                                                                                                                                                                                                                                                                                                                                                                                                                                                                                                                                                                                    | Expanders - Apply equivalent subjects<br>Search modes - Boolean/Phrase |
| S14 | S9 OR S10 OR S11 OR S12                                                                                                                                                                                                                                                                                                                                                                                                                                                                                                                                                                                                                                                                                                                       | Expanders - Apply equivalent subjects<br>Search modes - Boolean/Phrase |
| S13 | Involv* OR "advisory group*" OR "research advisory group" OR "research advisory panel*" OR "advisory panel" OR "advisory committee*" OR "advisory board*" OR "youth engagement" OR "patient and public involvement" OR "public and patient involvement" OR "public patient involvement" OR "community based participatory research" OR "youth particip*" OR "adolescent engagement" OR "participatory design" OR "participatory action" OR "needs assessment*" OR "co produc*" OR "co design" OR "Human centered design" OR "Human centred design" OR "User centered design" OR "User centred design" OR "user involvement" OR "peer researcher*" OR "co researcher*" OR "Patient Participation" OR "young researcher*" OR "lived experience" | Expanders - Apply equivalent subjects<br>Search modes - Boolean/Phrase |
| S12 | (MM "Community Participation+")                                                                                                                                                                                                                                                                                                                                                                                                                                                                                                                                                                                                                                                                                                               | Expanders - Apply equivalent subjects<br>Search modes - Boolean/Phrase |
| S11 | (MM "Community-Based Participatory Research+")                                                                                                                                                                                                                                                                                                                                                                                                                                                                                                                                                                                                                                                                                                | Expanders - Apply equivalent subjects<br>Search modes - Boolean/Phrase |
| S10 | (MM "Patient Participation")                                                                                                                                                                                                                                                                                                                                                                                                                                                                                                                                                                                                                                                                                                                  | Expanders - Apply equivalent subjects<br>Search modes - Boolean/Phrase |
| S9  | (MM "Stakeholder Participation+")                                                                                                                                                                                                                                                                                                                                                                                                                                                                                                                                                                                                                                                                                                             | Expanders - Apply equivalent subjects<br>Search modes - Boolean/Phrase |
| S8  | S4 OR S7                                                                                                                                                                                                                                                                                                                                                                                                                                                                                                                                                                                                                                                                                                                                      | Expanders - Apply equivalent subjects<br>Search modes - Boolean/Phrase |
| S7  | S5 OR S6                                                                                                                                                                                                                                                                                                                                                                                                                                                                                                                                                                                                                                                                                                                                      | Expanders - Apply equivalent subjects<br>Search modes - Boolean/Phrase |
| S6  | (MM "Young Adult")                                                                                                                                                                                                                                                                                                                                                                                                                                                                                                                                                                                                                                                                                                                            | Expanders - Apply equivalent subjects<br>Search modes - Boolean/Phrase |
| S5  | (MM "Adolescent")                                                                                                                                                                                                                                                                                                                                                                                                                                                                                                                                                                                                                                                                                                                             | Expanders - Apply equivalent subjects<br>Search modes - Boolean/Phrase |

|    |                                                                                                                                                                                                                                 |                                                                        |
|----|---------------------------------------------------------------------------------------------------------------------------------------------------------------------------------------------------------------------------------|------------------------------------------------------------------------|
| S4 | AB (child* OR youth OR adolescen* OR "young people" OR "Young person*" OR "Young adult*" OR teen* OR juven* ) OR TI ( child* OR youth OR adolescen* OR "young people" OR "Young person*" OR "Young adult*" OR teen* OR juven* ) | Expanders - Apply equivalent subjects<br>Search modes - Boolean/Phrase |
| S3 | S1 OR S2                                                                                                                                                                                                                        | Expanders - Apply equivalent subjects<br>Search modes - Boolean/Phrase |
| S2 | AB "health research" OR TI "health research"                                                                                                                                                                                    | Expanders - Apply equivalent subjects<br>Search modes - Boolean/Phrase |
| S1 | (MM "Health Services Research+")                                                                                                                                                                                                | Expanders - Apply equivalent subjects<br>Search modes - Boolean/Phrase |



### Search strategy for Web of science

(((TS=(review)) AND TS=(“Health research” )) AND TS=(child\* OR youth OR adolescen\* OR "young people" OR "Young person\*" OR "Young adult\*" OR teen\* OR juven\*)) AND TS=(Involv\* OR "advisory group\*" OR "research advisory group" OR "research advisory panel\*" OR "advisory panel" OR "advisory committee\*" OR "advisory board\*" OR "youth engagement" OR "patient and public involvement" OR "public and patient involvement" OR "public patient involvement" OR "community based participatory research" OR "youth particip\*" OR "adolescent engagement" OR "participatory design" OR "participatory action" OR "needs assessment\*" OR "co produc\*" OR "co design" OR "Human centered design" OR "Human centred design" OR "User centered design" OR "User centred design" OR "user involvement" OR "peer researcher\*" OR "co researcher\*" OR "Patient Participation" OR "young researcher\*" OR “lived experience”)

# BMJ Open

## Involving adolescents in the design, implementation, evaluation, and dissemination of health research: an umbrella review protocol

|                                 |                                                                                                                                                                                                                                                                                                                                                                                                                                                                                                                                                                                                                                                                                           |
|---------------------------------|-------------------------------------------------------------------------------------------------------------------------------------------------------------------------------------------------------------------------------------------------------------------------------------------------------------------------------------------------------------------------------------------------------------------------------------------------------------------------------------------------------------------------------------------------------------------------------------------------------------------------------------------------------------------------------------------|
| Journal:                        | <i>BMJ Open</i>                                                                                                                                                                                                                                                                                                                                                                                                                                                                                                                                                                                                                                                                           |
| Manuscript ID                   | bmjopen-2022-069695.R1                                                                                                                                                                                                                                                                                                                                                                                                                                                                                                                                                                                                                                                                    |
| Article Type:                   | Protocol                                                                                                                                                                                                                                                                                                                                                                                                                                                                                                                                                                                                                                                                                  |
| Date Submitted by the Author:   | 27-Mar-2023                                                                                                                                                                                                                                                                                                                                                                                                                                                                                                                                                                                                                                                                               |
| Complete List of Authors:       | Warritch, Azza; Trinity College Dublin, Trinity Centre for Global Health; Trinity College Dublin, School of Psychology<br>Bruce, Delali; Trinity College Dublin, Trinity Centre for Global Health; Stanford University, School of Engineering<br>Lee, Maria; Trinity College Dublin, Trinity Centre for Global Health; Trinity College Dublin, School of Psychology<br>Curran, Paul; Trinity College Dublin, School of Psychology<br>Khraisha, Qusai; Trinity College Dublin, Trinity Centre for Global Health; Trinity College Dublin, School of Psychology<br>Hadfield, Kristin; Trinity College Dublin, Trinity Centre for Global Health; Trinity College Dublin, School of Psychology |
| <b>Primary Subject Heading</b>: | Global health                                                                                                                                                                                                                                                                                                                                                                                                                                                                                                                                                                                                                                                                             |
| Secondary Subject Heading:      | Health services research                                                                                                                                                                                                                                                                                                                                                                                                                                                                                                                                                                                                                                                                  |
| Keywords:                       | PAEDIATRICS, Protocols & guidelines < HEALTH SERVICES ADMINISTRATION & MANAGEMENT, Community child health < PAEDIATRICS                                                                                                                                                                                                                                                                                                                                                                                                                                                                                                                                                                   |
|                                 |                                                                                                                                                                                                                                                                                                                                                                                                                                                                                                                                                                                                                                                                                           |

SCHOLARONE™  
Manuscripts

1  
2  
3 **1 Involving adolescents in the design, implementation, evaluation, and dissemination of**  
4  
5 **2 health research: an umbrella review protocol**  
6  
7  
8 **3**  
9  
10 **4**  
11  
12 **5**  
13

14  
15 **6** Azza Warraitch\*<sup>1,2</sup>, Delali Bruce<sup>1,3</sup>, Maria Lee<sup>1,2</sup>, Paul Curran<sup>2</sup>, Qusai Khraisha<sup>1,2</sup>, Kristin  
16  
17 **7** Hadfield<sup>1,2</sup>  
18

19 **8**  
20  
21 **9** <sup>1</sup> Trinity Centre for Global Health, Trinity College Dublin, Dublin, Ireland.

22  
23  
24 **10** <sup>2</sup> School of Psychology, Trinity College Dublin, Dublin, Ireland.

25  
26 **11** <sup>3</sup> School of Engineering, Stanford University, United States.  
27

28  
29 **12** \*Correspondence: [warraita@tcd.ie](mailto:warraita@tcd.ie)  
30  
31  
32  
33  
34  
35  
36  
37  
38  
39  
40  
41  
42  
43  
44  
45  
46  
47  
48  
49  
50  
51  
52  
53  
54  
55  
56  
57  
58  
59  
60

## 14 Abstract

15 **Introduction:** A lack of awareness on *how* to engage adolescents in research has been reported as  
16 one of the barriers to meaningful youth involvement in health research. Currently available  
17 guidelines on youth involvement are limited in terms of the scope (e.g., focused on limited health  
18 research areas), content (e.g., include broad principles), and context (e.g., most guidelines are from  
19 high-income countries) for which the guidelines are applicable. To address this, we will develop a  
20 set of comprehensive guidelines based on consolidated evidence on youth involvement in health  
21 research. To inform these guidelines, we are first conducting an umbrella review to i) summarize  
22 and synthesize findings from reviews on involving adolescents in health research, ii) consolidate  
23 the challenges experienced in youth involvement and the recommendations to mitigate these  
24 challenges, iii) identify best practices, and iv) identify gaps and methodological weaknesses in the  
25 extant literature on involving adolescents in health research.

26 **Methods and analysis:** We will include review articles exploring adolescents' involvement in  
27 studies aiming to improve their physical or mental health. Databases to be searched include  
28 Cochrane Database of Systematic Reviews, Medical Literature Analysis and Retrieval System Online  
29 (MEDLINE), Scopus, Embase, PsycINFO, PsycArticles, Cumulative Index to Nursing and Allied  
30 Health Literature (CINAHL), Epistemonikos, and Health Systems Evidence. A grey literature search  
31 will be conducted in Web of Science, ProQuest, Google Scholar, and PROSPERO, supplemented  
32 by a hand search of the reference lists of eligible reviews, relevant journals, websites of related  
33 organizations, and input from experts. Data will be analyzed using narrative synthesis.

34 **Ethics and dissemination:** Ethical approval is not required as we are not collecting participant data  
35 as part of this review. The findings of this umbrella review will be disseminated through peer-  
36 reviewed publications, participatory workshops, and academic conferences.

1  
2  
3 37 **Umbrella review registration:** PROSPERO [CRD42021287467](https://www.crd.york.ac.uk/PROSPERO/record/CRD42021287467).

4  
5 38 **Strengths and limitations of this study**

- 6  
7  
8 39 • This umbrella review consolidates evidence from a highly varied range of reviews on youth  
9 involvement in health research, using a rigorous methodology and a comprehensive search  
10 40 strategy.  
11  
12 41  
13  
14 42 • This umbrella review will be conducted with active involvement from adolescents  
15 throughout to improve the relevance, quality, and dissemination of the findings.  
16  
17 43  
18  
19 44 • Only reviews published in English will be included.  
20  
21  
22  
23 45

24  
25 46 **Keywords:** Youth involvement, Participatory action research, Public and Patient Involvement  
26 (PPI), Health Research, Adolescent health.  
27  
28  
29  
30  
31  
32  
33  
34  
35  
36  
37  
38  
39  
40  
41  
42  
43  
44  
45  
46  
47

## 48 **Introduction**

49 Adolescents aged 10–24 years comprise 24% of the world's population (1). In the past two decades,  
50 there has been a global shift in attention towards the promotion of adolescent health (2, 3). The  
51 recent prioritization of adolescent health in global strategies (4, 5) is underpinned by a number of  
52 factors. First, adolescents experience a considerable proportion of the global population's disease  
53 burden, attributed to different communicable and non-communicable diseases and injuries (6, 7).  
54 Around 168 million Disability-Adjusted Life Years (DALYs) are lost to adolescents' mental health  
55 and physical health difficulties (6, 7). Second, establishing healthy behavioral patterns and  
56 minimizing exposure to risk factors among adolescents is a strong determinant for future health  
57 trajectories and can also improve the health of the next generation (3, 6). Third, the substantial  
58 improvements in maternal and child health outcomes, which have been achieved in recent decades  
59 through considerable global efforts, are at risk without adequate investments in adolescent health  
60 (3, 6, 8, 9). Lastly, improvement in adolescent health outcomes promotes their productivity,  
61 academic success, and future financial stability, and reduces the direct and indirect costs associated  
62 with disease burden, resulting in societal and economic benefits (3, 6, 10-13). For these reasons,  
63 adolescence is now widely considered a critical period in which to invest (3, 5, 9, 14), as reflected  
64 in the increase in development assistance for adolescent health, from 109.7 million dollars in 2003  
65 to 528.5 million dollars in 2015 (15).

66 Heralded by the UN Convention on the Rights of the Child, the involvement of young people in  
67 all decisions that affect their lives, including those relating to health and wellbeing, is now widely  
68 acknowledged as their fundamental right (16, 17). One method of including youth in such  
69 decisions is to engage them in the research process. Health research is an important avenue for  
70 informing the design of healthcare services and care provision to young people, as well as health

1  
2  
3 71 policy. Meaningful involvement of youth in health research is defined as "research that is done  
4  
5 72 'with' or 'by'" young people, "not 'to', 'about' or 'for' them" (18, 19). Adolescents can be engaged  
6  
7  
8 73 to define and prioritize research questions, design the research process, ensure the appropriateness  
9  
10 74 of the research methodology for the young population, collect and analyze data, and disseminate  
11  
12 75 the research findings (17, 19-24). There are several frameworks to describe the involvement of  
13  
14 76 children and adolescents in research and health services. These include Hart's ladder of young  
15  
16 77 people's participation framework (25), Shier's pathways to participation framework (26),  
17  
18 78 Treseder's non-linear model of participation (27), Wong's TYPE Pyramid framework (28),  
19  
20 79 Arunkumar's rope ladder model (29), and the five-dimensional framework for young people's  
21  
22 80 involvement in health research (19). The frameworks most commonly used to describe and  
23  
24 81 evaluate youth involvement are those proposed by Hart (25) and Shier (26).

25  
26  
27  
28  
29 82 Hart's ladder of young people's participation builds on Arnstein's ladder of citizen participation for  
30  
31 83 adults (30). This framework refers to eight steps in the ladder of participation: manipulation,  
32  
33 84 decoration, tokenism, assigned but informed, consulted and informed, adult-initiated shared  
34  
35 85 decisions with children, child-initiated and directed, and child-initiated shared decisions with  
36  
37 86 adults. Meaningful engagement begins at the fourth step of the ladder and ends with shared  
38  
39 87 decision-making at the highest step (25). Shier proposed an alternative framework that focuses on  
40  
41 88 elements of meaningful involvement. Shier's 'pathways to participation' model proposes five levels  
42  
43 89 of involvement, where on the first level young people are listened to, on the second level they are  
44  
45 90 supported to express their views, on the third level their views are taken into account, on the fourth  
46  
47 91 level they are involved in decision-making processes and on the fifth level they share power and  
48  
49 92 responsibility for decision making with the researchers (26). The relative simplicity of this model  
50  
51 93 makes it one of the most widely used frameworks for youth involvement (19, 31).

1  
2  
3 94 In recent years, there has been an increasing emphasis on the meaningful involvement of  
4  
5 95 adolescents in health research, using participatory approaches (17, 23, 31-36). Three driving  
6  
7 96 factors explain the context of this change around the involvement of adolescents in health research  
8  
9  
10 97 and service delivery(31). The first one is "consumer movement" (37), also equated with the term  
11  
12 98 "user involvement", emerging in the 1970s, that focuses on the integration of patients' views to  
13  
14  
15 99 ensure responsive and acceptable health services (31, 38). This approach has assumed a central  
16  
17 100 position in the National Health Service (NHS) health policy for adults since the late nineties (39-  
18  
19 101 41) and now encompasses the involvement of adolescents in the design and delivery of health  
20  
21 102 services and research (22, 31, 42).

22  
23  
24 103 Second, Article 12 of the UN Convention on the Rights of the Child (16) emphasized that children  
25  
26 104 and adolescents have a right to contribute to decisions regarding all matters relevant to young  
27  
28 105 people and that their views must be taken into account. Almost all countries have now ratified this  
29  
30 106 convention to achieve health equity by sharing power over decisions about adolescents (6, 43).  
31  
32  
33 107 This has led to a change in the perception of adolescents as social actors rather than passive  
34  
35 108 recipients of care and services designed and delivered by adult professionals (31, 35). This has  
36  
37 109 also resulted in an unprecedented demand for the representation of adolescents in health-related  
38  
39 110 decision-making, with multiple health and funding organizations strongly advocating for the  
40  
41 111 meaningful involvement of adolescents in health research to achieve the 2030 agenda for  
42  
43 112 Sustainable Development (3, 17, 19, 44-46).

44  
45  
46  
47  
48 113 Third, preliminary evidence on the impact of adolescents' contribution in health research highlights  
49  
50 114 multiple benefits of youth involvement from an operational, developmental, and societal  
51  
52 115 perspective (3, 6, 17, 19, 22, 31, 47, 48), further strengthening the cause for youth involvement.  
53  
54  
55 116 From an operational perspective, the involvement of adolescents improves research in several  
56  
57  
58  
59  
60



1  
2  
3 117 ways: i) it ensures that the research questions reflect the needs and preferences of adolescents (17,  
4  
5 118 19, 21, 49), ii) enhances the recruitment and retention rates of participants (19, 50-54), iii)  
6  
7 119 improves data collection (19, 21, 55-59), iv) improves data analysis by bringing unique insight of  
8  
9 120 adolescents in translating the responses (19, 60, 61), and v) facilitates broader and more effective  
10  
11 121 dissemination of the findings (6, 19, 57, 62). Moreover, organizations that work with adolescents  
12  
13 122 report an overall change in the organization's culture to be more inclusive (63). From a  
14  
15 123 developmental perspective, several positive outcomes have been reported for adolescents who  
16  
17 124 contribute to research projects, including i) learning new research skills (19, 47, 64-69), ii)  
18  
19 125 increased knowledge about health topics (19, 47, 51, 70-72), iii) better health outcomes (19, 47,  
20  
21 126 71, 73), and iv) better academic or career outcomes (6, 19, 22, 64, 74-76). At the societal level, the  
22  
23 127 involvement of adolescents has been linked with an increased awareness of different health issues  
24  
25 128 in the community (17, 19, 63, 77-80).

26  
27  
28  
29  
30  
31 129 Despite growing recognition of the fundamental rights of adolescents to contribute to research and  
32  
33 130 the potential benefits of involving them in research, Sellars et al (17) found that less than 1% of  
34  
35 131 studies on child and adolescent health report involving adolescents as part of advisory groups.  
36  
37 132 While involving young people in health research is on the rise, the overall number of studies that  
38  
39 133 involve youth is still low (19). This under-involvement of adolescents in health research may be  
40  
41 134 attributed to the challenges or barriers experienced by researchers and adolescents contributing to  
42  
43 135 research projects (17). These challenges include a lack of awareness of the evidence on youth  
44  
45 136 involvement (19, 81), a need for extensive training to effectively engage youth in research (17, 19,  
46  
47 137 48, 57, 81-87), limited training resources and a lack of a comprehensive set of guidelines on  
48  
49 138 engaging youth in health research (19, 48, 81, 88, 89), inadequate funding to support meaningful  
50  
51 139 youth involvement (83, 86, 90), difficulties in recruiting and retaining adolescents (86, 87, 91),  
52  
53  
54  
55  
56  
57  
58  
59  
60

1  
2  
3 140 complex ethical procedures such as additional consent and assent requirements, and compliance  
4  
5 141 with different safeguarding practices that vary for different contexts (49, 57, 92). To address some  
6  
7 142 of the highlighted challenges to meaningful youth involvement, we aim to develop a  
8  
9 143 comprehensive set of guidelines for involving youth in health research. While there are several  
10  
11 144 guidelines available on involvement of young people in health research, a recent review  
12  
13 145 highlighted that these guidelines are limited in their scope, contexts, and the content that they cover  
14  
15 146 (19). For example, overlooked areas of youth involvement such as involvement in the early and  
16  
17 147 late stages of the research process, working with young people in LMICs, and working with those  
18  
19 148 from disadvantaged groups, are some aspects that need to be emphasised in a set of comprehensive  
20  
21 149 guidelines (81). While subject-specific guidelines, where they exist, may offer more targeted  
22  
23 150 guidance on engaging young people in research on specific health issues, a comprehensive set of  
24  
25 151 guidelines can be of use to a larger target audience of those working with youth in different types  
26  
27 152 of health areas. Furthermore, as most of the principles of youth engagement are transdisciplinary  
28  
29 153 (e.g., informed consent, power dynamics, inclusivity), an overall set of guidelines holds the  
30  
31 154 potential to be useful and relevant to a wider audience working on a range of health research areas.  
32  
33 155 This umbrella review will inform the development of these guidelines by consolidating the review-  
34  
35 156 level evidence on youth involvement in health research. This umbrella review will be followed by  
36  
37 157 a rapid review to consolidate the recommendations from the existing guidelines on youth  
38  
39 158 engagement in health research. Further details on the guideline development process can be  
40  
41 159 accessed on the OSF page. There are numerous reviews on youth involvement in health research.  
42  
43 160 However, these reviews focus on specific areas of health research (e.g., sexual and reproductive  
44  
45 161 health, mental health), certain types of youth involvement approaches (e.g., peer-mediated  
46  
47 162 interventions, participatory action research), specific locations (e.g., United States of America,  
48  
49  
50  
51  
52  
53  
54  
55  
56  
57  
58  
59  
60

1  
2  
3 163 India), and are heterogenous in their methods (e.g., search different databases, use different age  
4  
5 164 groups etc.) and findings. Furthermore, there is little overlap in the studies that are included in  
6  
7  
8 165 these reviews, highlighting the need to bring together all available evidence on youth involvement  
9  
10 166 in different areas of health research in different contexts and to translate these findings into  
11  
12 167 recommendations. Given the broad scope of the research objectives and the heterogeneity in the  
13  
14  
15 168 extant literature, an umbrella review is a more suitable choice of review than a systematic review  
16  
17 169 of primary studies (93).

18  
19  
20 170 Therefore, we aim to conduct an umbrella review to i) summarize and synthesize findings from  
21  
22 171 reviews on involving adolescents in health research, ii) consolidate the challenges experienced in  
23  
24 172 youth involvement and the recommendations to mitigate these challenges, iii) identify the best  
25  
26  
27 173 practices or recommendations on involving adolescents in health research, and iv) identify gaps  
28  
29 174 and methodological weaknesses in the extant literature.

### 30 31 175 **Methods and analysis**

32  
33  
34 176 This umbrella review will be conducted as per the Cochrane guidelines for overviews of reviews  
35  
36 177 (94). However, some elements—types of reviews to be included and the appraisal method, in  
37  
38 178 particular—have been adapted (described below) to suit the objectives of the umbrella review. We  
39  
40  
41 179 followed the Preferred Reporting Items for Systematic Review and Meta-Analysis Protocols  
42  
43 180 (PRISMA-P) guidelines in reporting this protocol (Additional file 1). We will report findings in  
44  
45 181 accordance with the Preferred Reporting Items for Systematic Review and Meta-Analysis  
46  
47 182 (PRISMA) statement (95) given that the PRISMA extension for overviews of reviews (Preferred  
48  
49  
50 183 Reporting Items for Overviews of Reviews; PRIOR) is under development and is thus not available  
51  
52 184 for this umbrella review (96). The umbrella review has been registered with the International  
53  
54  
55  
56  
57  
58  
59  
60

1  
2  
3 185 Prospective Register of Systematic Reviews (PROSPERO CRD42021287467). The PROSPERO  
4  
5 186 registration was updated to pre-register some changes to the methodology described below.  
6  
7

### 8 187 **Search strategy**

9  
10 188 The search strategy for this umbrella review includes keywords for; a) population (adolescents  
11  
12 189 aged 10-24 years) (97), b) intervention or exposure (involvement of adolescents in health  
13  
14 190 research), c) condition under study (health of adolescents), and d) review type (including  
15  
16 191 narrative reviews, targeted reviews, rapid reviews, scoping reviews, literature reviews,  
17  
18 192 qualitative reviews, integrated reviews, evidence maps, critical reviews, mixed methods reviews,  
19  
20 193 overviews, state of the art reviews, practitioner reviews, systematic reviews, as well as meta-  
21  
22 194 analyses) using Boolean syntax. Authors AW and KH developed the search strategy in  
23  
24 195 consultation with a research librarian (GF) at Trinity College Dublin.  
25  
26  
27  
28

29 196 A commonly reported problem in studying youth involvement is the inconsistent use of  
30  
31 197 terminologies and a wide range of methodologies classified as youth involvement (19, 48). The  
32  
33 198 search strategy is attached in the supplementary materials (Additional File 2).  
34  
35  
36

### 37 199 **Information sources**

#### 38 39 200 **Electronic databases**

40  
41  
42 201 We will search Cochrane Database of Systematic Reviews, Medical Literature Analysis and  
43  
44 202 Retrieval System Online (MEDLINE), Scopus, Embase, PsycINFO, PsycArticles, Cumulative  
45  
46 203 Index to Nursing and Allied Health Literature (CINAHL), Epistemonikos, and Health Systems  
47  
48 204 Evidence databases for potentially eligible reviews conducted up to 30<sup>th</sup> November 2021.  
49  
50  
51

#### 52 205 **Grey literature search**

53  
54  
55  
56  
57  
58  
59  
60

1  
2  
3 206 The grey literature search involves several components. First, a simplified search strategy – based  
4  
5 207 on different combinations of fewer key search terms – will be used to search Google Scholar for  
6  
7 208 additional reviews. The Google Scholar search will be restricted to the first 10 pages. Second,  
8  
9 209 we will identify the top 10 ranking pediatrics, perinatology, and child health journals using the  
10  
11 210 Scimago Journal and Country Rank list for 2020 (17). A similar simplified version of the search  
12  
13 211 strategy will be used to search these journals for additional reviews that could be potentially  
14  
15 212 eligible for inclusion. Third, Web of Science and ProQuest will be searched to identify additional  
16  
17 213 conference abstracts, theses, reports, and unpublished relevant reviews. The search strategy will  
18  
19 214 be modified to suit the interface of these databases, as required. The search strategy for Web of  
20  
21 215 Science is attached in the supplementary materials (Additional File 3). Fourth, we will search for  
22  
23 216 relevant reviews registered on PROSPERO. Authors of potentially eligible reviews will be  
24  
25 217 contacted to check whether the reviews are close to completion or have been completed. The  
26  
27 218 authors will be requested to share the extracted data for inclusion in the umbrella review for  
28  
29 219 complete or close to completion reviews. The number of contacts made and the number of  
30  
31 220 authors who agreed to share the data will be recorded and reported. Fifth, websites of relevant  
32  
33 221 organizations will also be searched for grey literature. This will involve compiling a list of  
34  
35 222 organizations (including governmental, non-profit, and funding organizations) working on  
36  
37 223 adolescents' health. We will conduct a targeted search of up to 20 pages of Google, the Mental  
38  
39 224 Health Innovation Network (MHIN) database, and including organisations known to the authors.  
40  
41 225 The mental health innovation network is a community of global mental health researchers, health  
42  
43 226 professionals, policymakers, and other relevant stakeholders. MHIN has a database of  
44  
45 227 organizations working to promote health in communities in low-, middle-, and high-income  
46  
47 228 countries. The MHIN database interface has search options for organizations based on the target  
48  
49  
50  
51  
52  
53  
54  
55  
56  
57  
58  
59  
60

1  
2  
3 229 population that they work with and the countries. We will use the filter for age range to identify  
4  
5 230 the organizations that work with young people. After identifying the organizations, we will  
6  
7  
8 231 search for relevant documents by running a simplified search strategy, like the one used for  
9  
10 232 searching Google Scholar, on the website homepages of these organizations. The first ten pages  
11  
12 233 of the results will be searched. Websites without a search option will be hand-searched. We will  
13  
14 234 also search Google for youth health organizations in low- and middle-income countries and  
15  
16 235 search the website of one organization (top google result) for each country. We will use World  
17  
18 236 Bank's classification of countries to define low- and middle-income countries and DAC list of  
19  
20 237 ODA recipients(98). We will only search the website of the organization that is the top google  
21  
22 238 result for each of the 137 low- and middle-income countries to ensure at least one organisation  
23  
24 239 from each country is included. Names of all organisational websites searched, and the titles and  
25  
26 240 URL links to eligible materials will be extracted in the excel spreadsheet for grey literature,  
27  
28 241 which will be posted on the review's [Open Science Framework \(OSF\) page](#). Sixth, we will  
29  
30 242 contact five to ten experts in youth involvement in health research. They will be regarded as an  
31  
32 243 expert if, a) they oversee youth involvement in health research component at a funding  
33  
34 244 organization (e.g., Wellcome Trust, Grand Challenges Canada) or youth health organization  
35  
36 245 and/or, b) have conducted studies which involved adolescents as collaborators at different stages  
37  
38 246 of the research process. We will include experts from high-, middle-, and low-income countries.  
39  
40 247 After identifying potential experts to be contacted, we will send them an email stating the aims  
41  
42 248 of the umbrella review, eligibility criteria for reviews, and a statement requesting that they share  
43  
44 249 the references of any relevant materials they might be familiar with. Seventh, reference lists of  
45  
46 250 all eligible reviews will be reviewed to identify further relevant reviews. Finally, all the eligible  
47  
48 251 reviews will be entered in the connectedpapers software to identify similar papers. This  
49  
50  
51  
52  
53  
54  
55  
56  
57  
58  
59  
60

1  
2  
3 252 comprehensive strategy aims to identify all published and unpublished reviews on this topic and  
4  
5 253 get the broadest range of views possible for inclusion in the umbrella review. The grey literature  
6  
7  
8 254 search will be conducted by AW.  
9

### 10 255 **Data management**

11  
12  
13  
14 256 All references from electronic databases will be exported to Covidence. We will record the search  
15  
16 257 date, the number of results for each database and each combination of the search terms for grey  
17  
18 258 literature search. For the grey literature, titles and URL links to potentially relevant documents  
19  
20  
21 259 will be entered in an excel spreadsheet for grey literature (99).  
22

### 23 260 **Eligibility Criteria**

#### 24 25 261 **Study Design**

26  
27  
28 262 Only review articles will be eligible for inclusion in this umbrella review. Although the Cochrane  
29  
30 263 Overview of reviews guidelines recommend including systematic reviews and meta-analysis, we  
31  
32 264 will include review articles of all types, including narrative reviews, targeted reviews, rapid  
33  
34 265 reviews, scoping reviews, literature reviews, qualitative reviews, integrated reviews, evidence  
35  
36 266 maps, critical reviews, desk reviews, mixed methods reviews, overviews, state of the art reviews,  
37  
38 267 practitioner reviews, systematic reviews, as well as meta-analyses (100). This adaptation to the  
39  
40 268 guidelines is due to the qualitative nature of the outcomes of interest and to ensure the inclusion  
41  
42 269 of a wide range of literature on youth involvement. This adaptation to the guidelines is common  
43  
44 270 in umbrella reviews focusing on qualitative data and outcomes (101).  
45  
46  
47  
48

#### 49 271 **Participants**

50  
51  
52 272 We will only include reviews that discuss youth-specific results; the age range of participants in  
53  
54 273 studies included in the review can vary, but the target population of the review must include  
55  
56  
57  
58  
59  
60

1  
2  
3 274 adolescents. Adolescents are young people between the ages of 10 to 24 years as defined by  
4  
5 275 Sawyer et al. (97). All reviews focusing on children and adolescents irrespective of the age range  
6  
7 276 (as long as these include some studies for adolescents aged between 10 and 24 years) will be  
8  
9  
10 277 included, but primary studies where the age range of the target population is below ten years or  
11  
12 278 above 24 years will be excluded. Reviews and studies where the age range is not mentioned, rather  
13  
14 279 the terms children and adolescents are listed will be included. No other restrictions will be applied  
15  
16 280 based on demographic characteristics or context. Reviews that are overlapping in terms of age  
17  
18 281 range will be included, however, overlap in the primary studies included in reviews will be  
19  
20 282 addressed using the procedure described below in study selection section.  
21  
22  
23

24 283 We are focusing on adolescents aged 10-24 for three reasons; i) this umbrella review aims to  
25  
26 284 inform the development of a set of comprehensive guidelines on involvement of adolescents aged  
27  
28 285 10-24 to address the gaps in the currently available guidelines on involvement of adolescents in  
29  
30 286 health research (19), ii) based on their developmental status, the methods used to engage children  
31  
32 287 might be different than the ones used to engage adolescents therefore the recommendations for  
33  
34 288 both age groups would vary, iii) logistical considerations including the additional time and  
35  
36 289 resources required to develop recommendations on engaging children younger than 10 years.  
37  
38  
39  
40

## 41 290 **Intervention**

42  
43  
44 291 Reviews exploring youth involvement in studies that focus on the promotion of physical and  
45  
46 292 mental health or treatment of physical and mental health difficulties among adolescents will be  
47  
48 293 eligible. We will include reviews focusing on overall youth engagement as long as these include  
49  
50 294 at least one study on youth involvement in health research in accordance with Cochrane guidelines  
51  
52 295 which advise that where a particular review's research objectives are broader than those of an  
53  
54  
55  
56  
57  
58  
59  
60



1  
2  
3 296 umbrella review, the umbrella review should only include primary studies from that review that  
4  
5 297 meet the eligibility criteria for the umbrella review (94).  
6  
7

8 298 Youth involvement in health research refers to a wide range of methods and strategies used to  
9  
10 299 involve young people in the design, conduct, analysis, and dissemination of research on adolescent  
11  
12 300 health. Their involvement can range from consultation where young people are asked for advice  
13  
14 301 and to share their views to inform decision-making (22), to collaboration which is characterised  
15  
16 302 by “active, on-going partnership with young people” (22) and youth led research which involves  
17  
18 303 “putting the locus of power, initiative and subsequent decision-making with young people” (22).  
19  
20 304 This review will focus on all three levels of youth involvement in addition to all approaches to  
21  
22 305 youth involvement.  
23  
24  
25  
26

## 27 306 **Outcomes**

28  
29  
30 307 Reviews including one or more of the following outcomes will be eligible for inclusion: i)  
31  
32 308 strategies that have been used to involve adolescents in conducting health research, ii)  
33  
34 309 recommendations for involving adolescents in health research (best practices), iii) barriers to  
35  
36 310 meaningful youth involvement, iv) mitigation strategies to address these barriers and, v) evidence  
37  
38 311 gaps in youth involvement in health research.  
39  
40  
41

## 42 312 **Other criteria**

43  
44  
45 313 Only reviews published in the English language will be considered for inclusion. Reviews where  
46  
47 314 data extraction tables for the primary studies (applicable to systematic, rapid, and scoping reviews)  
48  
49 315 are inaccessible will be excluded. As per the Cochrane guidelines for overviews of reviews (94),  
50  
51 316 if a review’s research objectives and scope are broader than the current umbrella review, the subset  
52  
53 317 of primary studies meeting the review's eligibility criteria will be included in this umbrella review.  
54  
55  
56  
57

## 318 **Selection of studies**

319 Search results will be imported into Covidence for the removal of duplicate references. The  
320 eligibility criteria will be discussed among researchers conducting the title and abstract screening  
321 to ensure mutual understanding of the criteria. Title and abstract screening of the studies will be  
322 undertaken by two postgraduate-level psychology students and an adolescent co-researcher. They  
323 will first conduct a pilot screening of 1% of randomly selected search results. Any discrepancies  
324 will be discussed and resolved before proceeding with title and abstract screening for the rest of  
325 the articles. AW will conduct the title and abstract screening of all articles, while co-researchers  
326 (QK) and an adolescent researcher will conduct title and abstract screening of 25% of articles to  
327 minimize the risk of bias. Where eligibility cannot be determined based on abstract, such articles  
328 will be labeled ambiguous and reviewed in full.

329 AW will conduct full-text screening and extract data from all eligible articles, while QK and an  
330 adolescent researcher will conduct full-text screening and data extraction for 10% of articles.  
331 Reasons for exclusion will be recorded for all excluded articles at this stage. Any discrepancies  
332 or disagreements will be resolved through discussion among these three researchers and, if  
333 required, through discussion with a fourth researcher (KH). The screening and study selection  
334 process will be reported in a PRISMA flow chart (102).

335 Overlap in primary studies across multiple reviews can give undue weightage to studies included  
336 more than once in the synthesis of findings. It is recommended to address the risk of overlap at the  
337 inclusion, data extraction, or synthesis stage (103). We will assess the overlap in primary studies  
338 at the data extraction and synthesis stage by creating a citation matrix (94, 104) where the primary  
339 studies will be cross-linked with the reviews they are included in. The reviews will be listed in  
340 columns, and the primary studies will be added in rows, with a tick mark added under all reviews

1  
2  
3 341 that include a primary study. The overlap will be quantified by calculating the corrected covered  
4  
5 342 area measure (104) that indicates the degree of overlap. The citation matrix will help us ensure  
6  
7  
8 343 that the results of primary studies included in multiple reviews are only included once (103, 104).  
9  
10 344 This citation matrix will be posted on the review's [OSF page](#).

### 13 345 **Data extraction**

14  
15  
16 346 Data from the included reviews will be extracted using a data extraction form designed in  
17  
18 347 Covidence. The data extraction form will be piloted by researchers extracting the data, using 1%  
19  
20 348 of eligible full-text articles. Inter-rater reliability between the researchers will be assessed using  
21  
22 349 the kappa statistic for the closed-ended fields of the data extraction form and risk of bias assessment.  
23  
24  
25 350 For open-ended data extraction fields, AW will compare the data extracted by all team members  
26  
27 351 to assess whether a general agreement has been established on the data extraction process. Data on  
28  
29  
30 352 results will be extracted only from the included reviews. Data will be extracted on:

31  
32  
33 353 **a)** Characteristics of eligible reviews including review title, names and contact details of study  
34  
35 354 authors, publication type (e.g., article, conference abstract, report, etc.), review type  
36  
37 355 (scoping, narrative, systematic, etc.), the age range of study population in the review, the  
38  
39 356 condition under study (e.g., physical health, mental health, or specific disease/disorder),  
40  
41 357 aim of the review, definition of youth involvement used, search strategy, databases and  
42  
43  
44 358 grey literature sources searched, search end date, method of synthesis, and tool used to  
45  
46 359 appraise the risk of bias for the primary studies.

47  
48  
49 360 **b)** Characteristics of primary studies include their eligibility criteria, the number of primary  
50  
51 361 studies included in the review, the study design of primary studies, and the risk of bias  
52  
53  
54 362 results for the primary studies.

1  
2  
3 363 c) Findings will consist of the use of different youth involvement strategies, level of youth  
4  
5 364 involvement, challenges, or barriers in the use of youth involvement strategies,  
6  
7  
8 365 recommendations to address these barriers, best practices in youth involvement in health  
9  
10 366 research, limitations of the review, and gaps identified in the literature.  
11  
12

### 13 367 **Risk of bias assessment**

14  
15  
16 368 A MeaSurement Tool to Assess systematic Reviews-2 (AMSTAR 2) (105) will be used to assess  
17  
18 369 the methodological quality of included systematic reviews. The risk of bias assessments conducted  
19  
20 370 for the primary studies in the included reviews will be narratively summarized. AW will conduct  
21  
22 371 the risk of bias assessment of all eligible systematic reviews, while a second reviewer will conduct  
23  
24 372 the risk of bias assessment for 10% of eligible systematic reviews. Any discrepancies or  
25  
26 373 disagreements will be resolved through discussion among these two researchers and, if required,  
27  
28 374 through discussion with a third researcher (KH).  
29  
30  
31  
32

### 33 375 **Narrative synthesis**

34  
35  
36 376 A narrative synthesis will be conducted by AW and a youth co-researcher to analyse the data. The  
37  
38 377 first step will include familiarization with the extracted data through close reading, followed by  
39  
40 378 coding the extracted data using deductive coding. Then, the codes will be structured under broader  
41  
42 379 themes. Finally, these themes will be summarised in a descriptive and tabular form, centred around  
43  
44 380 the research aims and objectives. AW and a youth co-researcher will analyse a subset of the data  
45  
46 381 together until there is a general agreement on the coding and narrative building.  
47  
48  
49

### 50 382 **Patient and Public Involvement**

51  
52 383 Adolescents will be involved in the title and abstract screening, full-text screening, data extraction,  
53  
54 384 analysis, and dissemination phases of this umbrella review. These adolescents will be invited to  
55  
56  
57  
58  
59  
60

1  
2  
3 385 participate through local non-profit organizations and/or academic institutions. Specifically, the  
4  
5 386 youth co-researchers and co-authors DB, ML, and PC reviewed the final protocol for the umbrella  
6  
7 387 review and shared their input. An adolescent co-researcher will be recruited to conduct title and  
8  
9 388 abstract screening for 25% of the articles and undertake full-text screening and data extraction for  
10  
11 389 10% of articles to ensure representation of youth in decision-making processes. Another youth co-  
12  
13 390 researcher will contribute to the data analysis by working with AW to develop themes and write  
14  
15 391 up the narrative synthesis. To increase the relevance of the findings, we will seek input from 6-8  
16  
17 392 members of a youth advisory group in two participatory workshops. In the first workshop, young  
18  
19 393 people will be invited to share their interpretation of the results and reflections on the challenges  
20  
21 394 and recommendations highlighted in the literature. In the second workshop, they will contribute  
22  
23 395 by reviewing the outputs of this umbrella review and ensuring the language used is accessible and  
24  
25 396 inclusive. We will also facilitate the young co-researchers and advisors to present the findings to  
26  
27 397 the scientific community via video abstracts and to youth and lay audiences through dissemination  
28  
29 398 methods determined by the youth themselves to ensure more effective and wider dissemination of  
30  
31 399 the results. Youth co-researchers will also help us recruit youth advisors for the review. Previous  
32  
33 400 experience of research will not be a criterion for youth co-researchers to be engaged in this project.  
34  
35  
36  
37  
38  
39

## 401 **Discussion**

402 This review will bring together evidence on the most effective ways of involving adolescents in  
403 health research, challenges experienced in this process, and mitigation strategies which have been  
404 recommended to address or prevent these challenges. These findings will inform the development  
405 of guidelines on involving adolescents in health research. The need for a comprehensive set of  
406 guidelines and resources on involving adolescents in health research has been highlighted by youth  
407 researchers (81) and studies (83, 106-109). These guidelines will facilitate researchers to

1  
2  
3 408 collaborate with adolescents more effectively, leading to more meaningful involvement of  
4  
5 409 adolescents in research.  
6  
7

8 410 This umbrella review has a few limitations. The search for eligible reviews will be restricted to the  
9  
10 411 English language. Additionally, while the search strategy incorporates a wide range of terms to  
11  
12 412 account for the variation in terminology around youth involvement, there is a possibility that  
13  
14 413 relevant reviews indexed using different terms will not be included. Moreover, umbrella reviews  
15  
16 414 are based on the information presented in the review articles and are therefore limited by the quality  
17  
18 415 of extracted data in the included reviews. There is also a possibility of missing relevant data on  
19  
20 416 youth involvement in health research that has not previously been included in reviews. This review  
21  
22 417 only focuses on involvement of adolescents aged 10-24 in health research therefore the findings  
23  
24 418 of the review will not be generalisable to children younger than 10 years. Given the focus on  
25  
26 419 adolescent involvement in health research, any relevant guidance on engaging young people based  
27  
28 420 on research in other disciplines and fields may be excluded. Any deviations to the submitted  
29  
30 421 protocol will be documented as amendments to the PROSPERO registration.  
31  
32  
33  
34  
35

36 422 **Ethics and dissemination:** Only reviews will be included in this umbrella review; therefore, ethical  
37  
38 423 approval is not required. The findings of this umbrella review will be disseminated through peer-  
39  
40 424 reviewed publications, participatory workshops, and academic conferences.  
41  
42

### 43 425 **Supplementary Information**

44  
45 426 Additional file 1. PRISMA-P Checklist.

46  
47 427 Additional file 2. Search strategy for MEDLINE

48  
49 428 Additional file 3. Search strategy for Web of Science  
50  
51  
52

### 53 429 **Competing interests**

54  
55 430 The authors declare that they have no competing interests.  
56  
57  
58  
59  
60

1  
2  
3 **431 Funding statement**  
4

5 432 Azza Warraitch received the Ussher Fellowship from Trinity College Dublin to support her PhD  
6  
7 433 research, including this umbrella review. She received a Trinity Research in Social Sciences  
8  
9  
10 434 (TRiSS) Research Fellowship to conduct participatory workshops with youth as part of this  
11  
12 435 umbrella review. The funders did not play any role in design of this review.  
13

14  
15 **436 Authors' contributions**  
16

17 437 AW and KH conceptualized and wrote the protocol with valuable inputs from QK. DB, ML, PC  
18  
19 438 will contribute to the screening, data extraction and analysis of this review as young co-researchers.  
20  
21 439 All authors have reviewed and approved the final manuscript.  
22

23  
24 **440 Acknowledgments**  
25

26 441 We would like to acknowledge all members of the Trinity Centre for Global Health and School of  
27  
28 442 Psychology – especially Drs Sadhbh Byrne, Frédérique Vallieres, and Elizabeth Nixon – for their  
29  
30 443 valuable inputs. We would also like to thank Ms. Geraldine Fitzgerald, the research librarian at the  
31  
32 444 School of Medicine, Trinity College Dublin, for her feedback and input on the search strategy for  
33  
34 445 this umbrella review. We are very grateful to all the youth advisors and co-researchers who  
35  
36  
37 446 contributed to this project.  
38  
39  
40  
41  
42  
43  
44  
45  
46  
47  
48  
49  
50  
51  
52  
53  
54  
55  
56  
57  
58  
59  
60

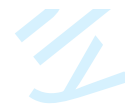

447 **References**

- 448 1. Nations U. Department of Economic and Social Affairs, Population Division. World  
449 Population Prospects 2019: Data Booklet (ST/ESA/SER. A/424).
- 450 2. Dick B, Ferguson BJ. Health for the world's adolescents: a second chance in the second  
451 decade. *Journal of Adolescent Health*. 2015;56(1):3-6.
- 452 3. Patton GC, Sawyer SM, Santelli JS, Ross DA, Afifi R, Allen NB, et al. Our future: a Lancet  
453 commission on adolescent health and wellbeing. *The Lancet*. 2016;387(10036):2423-78.
- 454 4. Kuruvilla S, Bustreo F, Kuo T, Mishra C, Taylor K, Fogstad H, et al. The Global strategy  
455 for women's, children's and adolescents' health (2016–2030): a roadmap based on evidence and  
456 country experience. *Bulletin of the World Health Organization*. 2016;94(5):398.
- 457 5. Temmerman M, Khosla R, Bhutta ZA, Bustreo F. Towards a new global strategy for  
458 women's, children's and adolescents' health. *bmj*. 2015;351.
- 459 6. Organization WH. Global accelerated action for the health of adolescents ( AA-HA!):  
460 guidance to support country implementation. 2017.
- 461 7. WHO. Global health estimates 2015: DALYs by cause, age, sex, by country and by region,  
462 2000-2015 Geneva. 2016 [Available from:  
463 [http://www.who.int/healthinfo/global\\_burden\\_disease/estimates/en/index2.html](http://www.who.int/healthinfo/global_burden_disease/estimates/en/index2.html).
- 464 8. Resnick MD, Catalano RF, Sawyer SM, Viner R, Patton GC. Seizing the opportunities of  
465 adolescent health. *The Lancet*. 2012;379(9826):1564-7.
- 466 9. Sawyer SM, Afifi RA, Bearinger LH, Blakemore S-J, Dick B, Ezech AC, et al. Adolescence:  
467 a foundation for future health. *The lancet*. 2012;379(9826):1630-40.
- 468 10. Gribble JN, Bremner J. The challenge of attaining the demographic dividend: Population  
469 Reference Bureau; 2012.
- 470 11. Deogan C, Ferguson J, Stenberg K. Resource needs for adolescent friendly health services:  
471 estimates for 74 low-and middle-income countries. *PLoS One*. 2012;7(12):e51420.
- 472 12. Stenberg K, Axelson H, Sheehan P, Anderson I, Gülmezoglu AM, Temmerman M, et al.  
473 Advancing social and economic development by investing in women's and children's health: a new  
474 Global Investment Framework. *The Lancet*. 2014;383(9925):1333-54.
- 475 13. Curtain R. The case for investing in young people as part of a national poverty reduction  
476 strategy. Paper commissioned by the United Nations Population Fund, New York. 2004.
- 477 14. Salam RA, Das JK, Lassi ZS, Bhutta ZA. Adolescent health and well-being: Background  
478 and methodology for review of potential interventions. *Journal of adolescent health*.  
479 2016;59(4):S4-S10.
- 480 15. Li Z, Li M, Patton GC, Lu C. Global development assistance for adolescent health from  
481 2003 to 2015. *JAMA network open*. 2018;1(4):e181072-e.
- 482 16. Unicef. Convention on the Rights of the Child. 1989.
- 483 17. Sellars E, Pavarini G, Michelson D, Creswell C, Fazel M. Young people's advisory groups  
484 in health research: scoping review and mapping of practices. *Archives of Disease in Childhood*.  
485 2021;106(7):698-704.
- 486 18. Authority NHR. What is public involvement in research? 2020 [Available from:  
487 <https://www.hra.nhs.uk/planning-and-improving-research/best-practice/public-involvement/>.
- 488 19. Wilson O, Daxenberger L, Dieudonne L, Eustace J, Hanard A, Krishnamurthi A, et al. A  
489 rapid evidence review of young people's involvement in health research. London: Wellcome.  
490 2020:3.



- 1  
2  
3 491 20. Oliveras C, Cluver L, Bernays S, Armstrong A. Nothing about us without RIGHTS—  
4 492 meaningful engagement of children and youth: from research prioritization to clinical trials,  
5 493 implementation science, and policy. *Journal of acquired immune deficiency syndromes (1999)*.  
6 494 2018;78(1):S27.
- 8 495 21. Pavarini G, Lorimer J, Manzini A, Goundrey-Smith E, Singh I. Co-producing research with  
9 496 youth: The NeurOx young people's advisory group model. *Health Expectations*. 2019;22(4):743-  
10 497 51.
- 11 498 22. Kirby P. A guide to actively involving young people in research. For Researchers, Research  
12 499 Commissioners and Managers, Involve Support Unit, Eastleigh, Hampshire. 2004.
- 13 500 23. Ozer EJ, Piatt AA. Adolescent Participation in Research: Innovation, rationale and next  
14 501 steps. 2017.
- 16 502 24. NIHR. Involving children and young people as advisors in research. Top tips and essential  
17 503 key issues for researchers. 2021.
- 18 504 25. Hart RA. Children's participation: From tokenism to citizenship. 1992.
- 19 505 26. Shier H. Pathways to participation: Openings, opportunities and obligations. *Children &*  
20 506 *society*. 2001;15(2):107-17.
- 22 507 27. Fund StC, Treseder P. Empowering Children and Young People: A Training Manual:  
23 508 Promoting Involvement in Decision-making: Save the Children Fund; 1997.
- 24 509 28. Wong NT, Zimmerman MA, Parker EA. A typology of youth participation and  
25 510 empowerment for child and adolescent health promotion. *American journal of community*  
26 511 *psychology*. 2010;46(1):100-14.
- 27 512 29. Arunkumar K, Bowman DD, Coen SE, El-Bagdady MA, Ergler CR, Gilliland JA, et al.  
28 513 Conceptualizing youth participation in children's health research: insights from a youth-driven  
29 514 process for developing a youth advisory council. *Children*. 2019;6(1):3.
- 31 515 30. Arnstein S. A ladder of citizen participation. *J Am Inst Planners* 35 (4): 216-224. 1969.
- 32 516 31. Gibson F. Building a culture of participation: young people's involvement in research.  
33 517 *Cancer Care for Adolescents and Young Adults* Oxford: Blackwell Publishing. 2008:214-28.
- 34 518 32. Clarke S. A "Child's rights perspective": the "right" of children and young people to  
35 519 participate in health care research. *Issues in comprehensive pediatric nursing*. 2015;38(3):161-80.
- 36 520 33. Daly W. "Adding their flavour to the mix": involving children and young people in care in  
37 521 research design. *Australian Social Work*. 2009;62(4):460-75.
- 39 522 34. Nygren JM, Lindberg S, Wärnestål P, Svedberg P. Involving children with cancer in health  
40 523 promotive research: a case study describing why, what, and how. *JMIR research protocols*.  
41 524 2017;6(2):e7094.
- 42 525 35. Kellett M. Children as active researchers: a new paradigm for the 21st century. National  
43 526 Centre for Research Methods Review Papers NCRM/003, ESRC National Centre for Research  
44 527 Methods. 2005.
- 46 528 36. Jacquez F, Vaughn LM, Wagner E. Youth as partners, participants or passive recipients: A  
47 529 review of children and adolescents in community-based participatory research (CBPR). *American*  
48 530 *journal of community psychology*. 2013;51(1-2):176-89.
- 49 531 37. Telford R, Boote JD, Cooper CL. What does it mean to involve consumers successfully in  
50 532 NHS research? A consensus study. *Health Expectations*. 2004;7(3):209-20.
- 52 533 38. Health Do. Strengthening Accountability: Involving Patients and the Public. Policy  
53 534 Guidance, Section 11 of the Health and Social Care Act 2001. Department of Health London;  
54 535 2001.

- 1  
2  
3 536 39. Smith E, Ross F, Donovan S, Manthorpe J, Brearley S, Sitzia J, et al. User involvement in  
4 537 the design and undertaking of nursing, midwifery and health visiting research. Nursing Research  
5 538 Unit, King's College London. 2005.
- 6 539 40. Hanley B, Bradburn J, Gorin S, Barnes M, Evans C, Goodare H, et al. Involving consumers  
7 540 in research & development in the NHS: briefing notes for researchers: Consumers in NHS  
8 541 Research Support Unit Winchester; 2000.
- 9 542 41. Health Do. Patient and public involvement in the new NHS: The Stationery Office London;  
10 543 1999.
- 11 544 42. Health GBD. Listening, hearing and responding Department of Health Action Plan: core  
12 545 principles for the involvement of children and young people. 2002.
- 13 546 43. Watch HR. 25th anniversary of the convention on the rights of the Child. 2017.
- 14 547 44. Partnership for Maternal NaCHIYAfFP, and Family Planning. Global consensus statement  
15 548 on meaningful adolescent and youth engagement. 2020 [Available from:  
16 549 <https://www.who.int/pmnch/mye-statement.pdf?ua=1>.
- 17 550 45. Bulc B, Al-Wahdani B, Bustreo F, Choonara S, Demaio A, Jácome DI, et al. Urgency for  
18 551 transformation: youth engagement in global health. *The Lancet Global Health*. 2019;7(7):e839-  
19 552 e40.
- 20 553 46. Nations U. Youth2030: The United Nations Strategy on Youth 2018 [Available from:  
21 554 <https://www.un.org/youthenvoy/youth-un/>.
- 22 555 47. Valdez ES, Skobic I, Valdez L, O Garcia D, Korchmaros J, Stevens S, et al. Youth  
23 556 participatory action research for youth substance use prevention: a systematic review. *Substance*  
24 557 *use & misuse*. 2020;55(2):314-28.
- 25 558 48. Rouncefield-Swales A, Harris J, Carter B, Bray L, Bewley T, Martin R. Children and  
26 559 young people's contributions to public involvement and engagement activities in health-related  
27 560 research: A scoping review. *PLoS ONE*. 2021;16(6):e0252774.
- 28 561 49. Denison JA, Pettifor A, Mofenson LM, Kasedde S, Marcus R, Konayuma KJ, et al. Youth  
29 562 engagement in developing an implementation science research agenda on adolescent HIV testing  
30 563 and care linkages in sub-Saharan Africa. *AIDS (London, England)*. 2017;31(Suppl 3):S195.
- 31 564 50. Gaillard S, Malik S, Preston J, Escalera BN, Dicks P, Touil N, et al. Involving children and  
32 565 young people in clinical research through the forum of a European Young Persons' Advisory  
33 566 Group: needs and challenges. *Fundamental & clinical pharmacology*. 2018;32(4):357-62.
- 34 567 51. Kulbok PA, Meszaros PS, Bond DC, Thatcher E, Park E, Kimbrell M, et al. Youths as  
35 568 partners in a community participatory project for substance use prevention. *Family & community*  
36 569 *health*. 2015;38(1):3-11.
- 37 570 52. Tsang VW, West L, Woods C, Koh CJ, McCune S, Mullin T, et al. Role of patients and  
38 571 parents in pediatric drug development. *Therapeutic innovation & regulatory science*.  
39 572 2019;53(5):601-8.
- 40 573 53. Comfort M, Raymond-Flesch M, Auerswald C, McGlone L, Chavez M, Minnis A.  
41 574 Community-engaged research with rural Latino adolescents: Design and implementation strategies  
42 575 to study the social determinants of health. *Gateways: international journal of community research*  
43 576 *& engagement*. 2018;11(1):90.
- 44 577 54. Vaughn LM, Wagner E, Jacquez F. A review of community-based participatory research  
45 578 in child health. *MCN: The American journal of maternal/child nursing*. 2013;38(1):48-53.
- 46 579 55. Valdez ES, Korchmaros J, Sabo S, Garcia DO, Carvajal S, Stevens S. How the US-Mexico  
47 580 border influences adolescent substance use: Youth participatory action research using photovoice.  
48 581 *International Journal of Drug Policy*. 2019;73:146-55.

- 1  
2  
3 582 56. Jardine CG, James A. Youth researching youth: Benefits, limitations and ethical  
4 583 considerations within a participatory research process. *International Journal of Circumpolar*  
5 584 *Health*. 2012;71(1):18415.
- 6 585 57. Bird D, Culley L, Lakhanpaul M. Why collaborate with children in health research: an  
7 586 analysis of the risks and benefits of collaboration with children. *Archives of Disease in Childhood-*  
8 587 *Education and Practice*. 2013;98(2):42-8.
- 9 588 58. Kelly B, Friel S, McShane T, Pinkerton J, Gilligan E. "I haven't read it, I've lived it!" The  
10 589 benefits and challenges of peer research with young people leaving care. *Qualitative Social Work*.  
11 590 2020;19(1):108-24.
- 12 591 59. Panter-Brick C, Eggerman M, Ager A, Hadfield K, Dajani R. Measuring the psychosocial,  
13 592 biological, and cognitive signatures of profound stress in humanitarian settings: impacts,  
14 593 challenges, and strategies in the field. *Conflict and health*. 2020;14(1):1-7.
- 15 594 60. Delman J. Participatory Action Research and young adults with psychiatric disabilities.  
16 595 *Psychiatric Rehabilitation Journal*. 2012;35(3):231.
- 17 596 61. Chappell P, Rule P, Dlamini M, Nkala N. Troubling power dynamics: youth with  
18 597 disabilities as co-researchers in sexuality research in South Africa. *Childhood*. 2014;21(3):385-99.
- 19 598 62. Mitchell K, Durante SE, Pellatt K, Richardson CG, Mathias S, Buxton JA. Naloxone and  
20 599 the Inner City Youth Experience (NICYE): a community-based participatory research study  
21 600 examining young people's perceptions of the BC take home naloxone program. *Harm reduction*  
22 601 *journal*. 2017;14(1):1-8.
- 23 602 63. Shamrova DP, Cummings CE. Participatory action research (PAR) with children and  
24 603 youth: An integrative review of methodology and PAR outcomes for participants, organizations,  
25 604 and communities. *Children and Youth Services Review*. 2017;81:400-12.
- 26 605 64. Anyon Y, Bender K, Kennedy H, Dechants J. A systematic review of youth participatory  
27 606 action research (YPAR) in the United States: Methodologies, youth outcomes, and future  
28 607 directions. *Health Education & Behavior*. 2018;45(6):865-78.
- 29 608 65. BAILEY S, BODDY K, Briscoe S, Morris C. Involving disabled children and young people  
30 609 as partners in research: a systematic review. *Child: care, health and development*. 2015;41(4):505-  
31 610 14.
- 32 611 66. Brosnan CA, Upchurch SL, Meininger JC, Hester LE, Johnson G, Eissa MA. Student  
33 612 nurses participate in public health research and practice through a school-based screening program.  
34 613 *Public Health Nursing*. 2005;22(3):260-6.
- 35 614 67. Capanec D, Clarke D, Plohman J, Gerard J. Engaging undergraduate nursing students in  
36 615 research: The students' experience of a summer internship program pilot project. *Journal of*  
37 616 *Nursing Education*. 2013;52(8):466-9.
- 38 617 68. Suleiman AB, Soleimanpour S, London J. Youth action for health through youth-led  
39 618 research. *J Community Pract*. 2006;14(1-2):125-45.
- 40 619 69. Lindquist-Grantz R, Abraczinskas M. Using youth participatory action research as a health  
41 620 intervention in community settings. *Health promotion practice*. 2020;21(4):573-81.
- 42 621 70. Abma T, Lips S, Schrijver J. Sowing seeds to harvest healthier adults: The working  
43 622 principles and impact of participatory health research with children in a primary school context.  
44 623 *International journal of environmental research and public health*. 2020;17(2):451.
- 45 624 71. Aceves-Martins M, Aleman-Diaz AY, Giral M, Solà R. Involving young people in health  
46 625 promotion, research and policy-making: practical recommendations. *International Journal for*  
47 626 *Quality in Health Care*. 2019;31(2):147-53.

- 1  
2  
3 627 72. Lane HG, Porter KJ, Hecht E, Harris P, Zoellner JM. A participatory process to engage  
4 628 Appalachian youth in reducing sugar-sweetened beverage consumption. *Health promotion*  
5 629 *practice*. 2019;20(2):258-68.
- 6 630 73. Sherman SG, Sutcliffe C, Srirojn B, Latkin CA, Aramratanna A, Celentano DD. Evaluation  
7 631 of a peer network intervention trial among young methamphetamine users in Chiang Mai,  
8 632 Thailand. *Social science & medicine*. 2009;68(1):69-79.
- 9 633 74. Mance GA, Mendelson T, Byrd III B, Jones J, Tandon D. Utilizing community-based  
10 634 participatory research to adapt a mental health intervention for African American emerging adults.  
11 635 *Progress in community health partnerships: research, education, and action*. 2010;4(2):131-40.
- 12 636 75. Stewart K-A, Brown SL, Wrensford G, Hurley MM. Creating a comprehensive approach  
13 637 to exposing underrepresented pre-health professions students to clinical medicine and health  
14 638 research. *J Natl Med Assoc*. 2020;112(1):36-43.
- 15 639 76. Sheridan R, Preston J, Stones S, Ainsworth S, Horton-Taylor D, Challinor R, et al. Patient  
16 640 and public involvement in a study of multimedia clinical trial information for children, young  
17 641 people and families. *Research for All*. 2020:47-65.
- 18 642 77. Davies A, Mwangome N, Yeri B, Mwangi G, Mumba N, Marsh V, et al. Evolution of a  
19 643 programme to engage school students with health research and science in Kenya. *Wellcome open*  
20 644 *research*. 2019;4.
- 21 645 78. Dennis Jr SF, Gaulocher S, Carpiano RM, Brown D. Participatory photo mapping (PPM):  
22 646 Exploring an integrated method for health and place research with young people. *Health & place*.  
23 647 2009;15(2):466-73.
- 24 648 79. Findholt NE, Michael YL, Davis MM. Photovoice engages rural youth in childhood obesity  
25 649 prevention. *Public Health Nursing*. 2011;28(2):186-92.
- 26 650 80. Masuku B, Mkhwanazi N, Young E, Koch A, Warner D. Beyond the lab: Eh! woza and  
27 651 knowing tuberculosis. *Medical Humanities*. 2018;44(4):285-92.
- 28 652 81. Das S, Daxenberger L, Dieudonne L, Eustace J, Hanard A, Krishnamurthi A, et al.  
29 653 Stakeholder consultation on involving young people in health research. London: Wellcome.  
30 654 2020:3.
- 31 655 82. Kendal SE, Milnes L, Welsby H, Prymachuk S, Group CR, Shafeeah C, et al. Prioritizing  
32 656 young people's emotional health support needs via participatory research. *Journal of psychiatric*  
33 657 *and mental health nursing*. 2017;24(5):263-71.
- 34 658 83. Wadman R, Williams AJ, Brown K, Nielsen E. Supported and valued? A survey of early  
35 659 career researchers' experiences and perceptions of youth and adult involvement in mental health,  
36 660 self-harm and suicide research. *Research involvement and engagement*. 2019;5(1):1-12.
- 37 661 84. Bradbury-Jones C, Taylor J. Engaging with children as co-researchers: challenges,  
38 662 counter-challenges and solutions. *International Journal of Social Research Methodology*.  
39 663 2015;18(2):161-73.
- 40 664 85. Franklin A, Sloper P. Listening and responding? Children's participation in health care  
41 665 within England. *Children's Health and Children's rights: Brill Nijhoff*; 2006. p. 11-29.
- 42 666 86. Hawke LD, Darnay K, Relihan J, Khaleghi-Moghaddam M, Barbic S, Lachance L, et al.  
43 667 Enhancing researcher capacity to engage youth in research: Researchers' engagement experiences,  
44 668 barriers and capacity development priorities. *Health Expectations*. 2020;23(3):584-92.
- 45 669 87. McCartan C, Burns S, Schubotz D. Recruitment and capacity-building challenges in  
46 670 participatory research involving young people in Northern Ireland. *Community Research for*  
47 671 *Participation: From theory to method*. 2012:283.

- 1  
2  
3 672 88. Mitchell SJ, Slowther AM, Coad J, Akhtar S, Hyde E, Khan D, et al. Ethics and patient  
4 673 and public involvement with children and young people. *Archives of Disease in Childhood:*  
5 674 *Education and Practice Edition.* 2019;104(4):200.
- 6 675 89. Morton KL, Atkin AJ, Corder K, Suhrcke M, Turner D, Van Sluijs EMF. Engaging  
7 676 stakeholders and target groups in prioritising a public health intervention: The Creating Active  
8 677 School Environments (CASE) online Delphi study. *BMJ Open.* 2017;7(1).
- 9 678 90. James RD, McGlone West K, Madrid TM. Launching native health leaders: Reducing  
10 679 mistrust of research through student peer mentorship. *American journal of public health.*  
11 680 2013;103(12):2215-9.
- 12 681 91. Peek L, Tobin-Gurley J, Cox RS, Scannell L, Fletcher S, Heykoop C. Engaging youth in  
13 682 post-disaster research: Lessons learned from a creative methods approach. *Gateways: International*  
14 683 *Journal of Community Research and Engagement.* 2016;9(1):89-112.
- 15 684 92. Huang X, O'Connor M, Ke L-S, Lee S. Ethical and methodological issues in qualitative  
16 685 health research involving children: A systematic review. *Nursing ethics.* 2016;23(3):339-56.
- 17 686 93. Pollock M, Fernandes RM, Becker LA, Pieper D, Hartling L. Chapter V: overviews of  
18 687 reviews. *Cochrane Handbook for systematic reviews of interventions version.* 2020;6.
- 19 688 94. Pollock M, Fernandes RM, Becker LA, Pieper D, Hartling L. Chapter V: overviews of  
20 689 reviews. *Cochrane Handbook for systematic reviews of interventions version.* 2018;6.
- 21 690 95. Shamseer L, Moher D, Clarke M, Ghersi D, Liberati A, Petticrew M, et al. Preferred  
22 691 reporting items for systematic review and meta-analysis protocols (PRISMA-P) 2015: elaboration  
23 692 and explanation. *Bmj.* 2015;349.
- 24 693 96. Pollock M, Fernandes RM, Pieper D, Tricco AC, Gates M, Gates A, et al. Preferred  
25 694 Reporting Items for Overviews of Reviews (PRIOR): a protocol for development of a reporting  
26 695 guideline for overviews of reviews of healthcare interventions. *Systematic reviews.* 2019;8(1):1-  
27 696 9.
- 28 697 97. Sawyer SM, Azzopardi PS, Wickremarathne D, Patton GC. The age of adolescence. *The*  
29 698 *Lancet Child & Adolescent Health.* 2018;2(3):223-8.
- 30 699 98. DAC list of ODA recipients [Available from: <https://www.oecd.org/dac/financing-sustainable-development/development-finance-standards/DAC-List-of-ODA-Recipients-for-reporting-2022-23-flows.pdf>]
- 31 700  
32 701  
33 702 99. Godin K, Stapleton J, Kirkpatrick SI, Hanning RM, Leatherdale ST. Applying systematic  
34 703 review search methods to the grey literature: a case study examining guidelines for school-based  
35 704 breakfast programs in Canada. *Systematic reviews.* 2015;4(1):1-10.
- 36 705 100. Grant MJ, Booth A. A typology of reviews: an analysis of 14 review types and associated  
37 706 methodologies. *Health information & libraries journal.* 2009;26(2):91-108.
- 38 707 101. Fennelly O, Cunningham C, Grogan L, Cronin H, O'Shea C, Roche M, et al. Successfully  
39 708 implementing a national electronic health record: a rapid umbrella review. *Int J Med Informatics.*  
40 709 2020;144:104281.
- 41 710 102. Page MJ, McKenzie JE, Bossuyt PM, Boutron I, Hoffmann TC, Mulrow CD, et al. The  
42 711 PRISMA 2020 statement: An updated guideline for reporting systematic reviews. *PLoS Medicine.*  
43 712 2021;18(3).
- 44 713 103. Lunny C, Pieper D, Thabet P, Kanji S. Managing Overlap of Primary Studies Results  
45 714 Across Systematic Reviews: Practical Considerations for Authors of Overviews of Reviews. 2021.
- 46 715 104. Pieper D, Antoine S-L, Mathes T, Neugebauer EA, Eikermann M. Systematic review finds  
47 716 overlapping reviews were not mentioned in every other overview. *Journal of clinical*  
48 717 *epidemiology.* 2014;67(4):368-75.

- 1  
2  
3 718 105. Shea BJ, Reeves BC, Wells G, Thuku M, Hamel C, Moran J, et al. AMSTAR 2: a critical  
4 719 appraisal tool for systematic reviews that include randomised or non-randomised studies of  
5 720 healthcare interventions, or both. *bmj*. 2017;358.
- 6 721 106. Flynn R, Walton S, Scott SD. Engaging children and families in pediatric health research:  
7 722 a scoping review. *Research involvement and engagement*. 2019;5(1):1-8.
- 8 723 107. Faithfull S, Brophy L, Pennell K, Simmons MB. Barriers and enablers to meaningful youth  
9 724 participation in mental health research: qualitative interviews with youth mental health  
10 725 researchers. *Journal of Mental Health*. 2019;28(1):56-63.
- 11 726 108. Postma L, Luchtenberg ML, Verhagen AE, Maeckelberghe EL. The attitudes of healthy  
12 727 children and researchers towards the challenges of involving children in research: an exploratory  
13 728 study. *Research involvement and engagement*. 2021;7(1):1-10.
- 14 729 109. Chan W, Thurairajah P, Butcher N, Oosterwijk C, Wever K, Eichler I, et al. Guidance on  
15 730 development and operation of Young Persons' Advisory Groups. *Archives of disease in childhood*.  
16 731 2020;105(9):875-80.

19  
20 732  
21  
22  
23  
24  
25  
26  
27  
28  
29  
30  
31  
32  
33  
34  
35  
36  
37  
38  
39  
40  
41  
42  
43  
44  
45  
46  
47  
48  
49  
50  
51  
52  
53  
54  
55  
56  
57  
58  
59  
60

## PRISMA-P 2015 Checklist

This checklist has been adapted for use with systematic review protocol submissions to BioMed Central journals from Table 3 in Moher D et al: Preferred reporting items for systematic review and meta-analysis protocols (PRISMA-P) 2015 statement. *Systematic Reviews* 2015 4:1

An Editorial from the Editors-in-Chief of *Systematic Reviews* details why this checklist was adapted - Moher D, Stewart L & Shekelle P: Implementing PRISMA-P: recommendations for prospective authors. *Systematic Reviews* 2016 5:15

| Section/topic                     | #  | Checklist item                                                                                                                                                                                  | Information reported                |                                     | Line number(s) |
|-----------------------------------|----|-------------------------------------------------------------------------------------------------------------------------------------------------------------------------------------------------|-------------------------------------|-------------------------------------|----------------|
|                                   |    |                                                                                                                                                                                                 | Yes                                 | No                                  |                |
| <b>ADMINISTRATIVE INFORMATION</b> |    |                                                                                                                                                                                                 |                                     |                                     |                |
| <b>Title</b>                      |    |                                                                                                                                                                                                 |                                     |                                     |                |
| Identification                    | 1a | Identify the report as a protocol of a systematic review                                                                                                                                        | <input checked="" type="checkbox"/> | <input type="checkbox"/>            | 1-2            |
| Update                            | 1b | If the protocol is for an update of a previous systematic review, identify as such                                                                                                              | <input type="checkbox"/>            | <input checked="" type="checkbox"/> |                |
| <b>Registration</b>               | 2  | If registered, provide the name of the registry (e.g., PROSPERO) and registration number in the Abstract                                                                                        | <input checked="" type="checkbox"/> | <input type="checkbox"/>            | 37             |
| <b>Authors</b>                    |    |                                                                                                                                                                                                 |                                     |                                     |                |
| Contact                           | 3a | Provide name, institutional affiliation, and e-mail address of all protocol authors; provide physical mailing address of corresponding author                                                   | <input checked="" type="checkbox"/> | <input type="checkbox"/>            | 6-12           |
| Contributions                     | 3b | Describe contributions of protocol authors and identify the guarantor of the review                                                                                                             | <input checked="" type="checkbox"/> | <input type="checkbox"/>            | 436-439        |
| <b>Amendments</b>                 | 4  | If the protocol represents an amendment of a previously completed or published protocol, identify as such and list changes; otherwise, state plan for documenting important protocol amendments | <input type="checkbox"/>            | <input checked="" type="checkbox"/> |                |
| <b>Support</b>                    |    |                                                                                                                                                                                                 |                                     |                                     |                |
| Sources                           | 5a | Indicate sources of financial or other support for the review                                                                                                                                   | <input checked="" type="checkbox"/> | <input type="checkbox"/>            | 431-435        |
| Sponsor                           | 5b | Provide name for the review funder and/or sponsor                                                                                                                                               | <input checked="" type="checkbox"/> | <input type="checkbox"/>            | 431-435        |
| Role of sponsor/funder            | 5c | Describe roles of funder(s), sponsor(s), and/or institution(s), if any, in developing the protocol                                                                                              | <input checked="" type="checkbox"/> | <input type="checkbox"/>            | 435            |
| <b>INTRODUCTION</b>               |    |                                                                                                                                                                                                 |                                     |                                     |                |
| <b>Rationale</b>                  | 6  | Describe the rationale for the review in the context of what is already known                                                                                                                   | <input checked="" type="checkbox"/> | <input type="checkbox"/>            | 129-174        |

| Section/topic                             | #   | Checklist item                                                                                                                                                                                                                              | Information reported                |                                     | Line number(s)          |
|-------------------------------------------|-----|---------------------------------------------------------------------------------------------------------------------------------------------------------------------------------------------------------------------------------------------|-------------------------------------|-------------------------------------|-------------------------|
|                                           |     |                                                                                                                                                                                                                                             | Yes                                 | No                                  |                         |
| <b>Objectives</b>                         | 7   | Provide an explicit statement of the question(s) the review will address with reference to participants, interventions, comparators, and outcomes (PICO)                                                                                    | <input checked="" type="checkbox"/> | <input type="checkbox"/>            | 170-174                 |
| <b>METHODS</b>                            |     |                                                                                                                                                                                                                                             |                                     |                                     |                         |
| <b>Eligibility criteria</b>               | 8   | Specify the study characteristics (e.g., PICO, study design, setting, time frame) and report characteristics (e.g., years considered, language, publication status) to be used as criteria for eligibility for the review                   | <input checked="" type="checkbox"/> | <input type="checkbox"/>            | 260-317                 |
| <b>Information sources</b>                | 9   | Describe all intended information sources (e.g., electronic databases, contact with study authors, trial registers, or other grey literature sources) with planned dates of coverage                                                        | <input checked="" type="checkbox"/> | <input type="checkbox"/>            | 199-254                 |
| <b>Search strategy</b>                    | 10  | Present draft of search strategy to be used for at least one electronic database, including planned limits, such that it could be repeated                                                                                                  | <input checked="" type="checkbox"/> | <input type="checkbox"/>            | Additional file 2 and 3 |
| <b>STUDY RECORDS</b>                      |     |                                                                                                                                                                                                                                             |                                     |                                     |                         |
| Data management                           | 11a | Describe the mechanism(s) that will be used to manage records and data throughout the review                                                                                                                                                | <input checked="" type="checkbox"/> | <input type="checkbox"/>            | 255-259                 |
| Selection process                         | 11b | State the process that will be used for selecting studies (e.g., two independent reviewers) through each phase of the review (i.e., screening, eligibility, and inclusion in meta-analysis)                                                 | <input checked="" type="checkbox"/> | <input type="checkbox"/>            | 261-286                 |
| Data collection process                   | 11c | Describe planned method of extracting data from reports (e.g., piloting forms, done independently, in duplicate), any processes for obtaining and confirming data from investigators                                                        | <input checked="" type="checkbox"/> | <input type="checkbox"/>            | 318-344                 |
| <b>Data items</b>                         | 12  | List and define all variables for which data will be sought (e.g., PICO items, funding sources), any pre-planned data assumptions and simplifications                                                                                       | <input checked="" type="checkbox"/> | <input type="checkbox"/>            | 318-344                 |
| <b>Outcomes and prioritization</b>        | 13  | List and define all outcomes for which data will be sought, including prioritization of main and additional outcomes, with rationale                                                                                                        | <input checked="" type="checkbox"/> | <input type="checkbox"/>            | 318-344                 |
| <b>Risk of bias in individual studies</b> | 14  | Describe anticipated methods for assessing risk of bias of individual studies, including whether this will be done at the outcome or study level, or both; state how this information will be used in data synthesis                        | <input checked="" type="checkbox"/> | <input type="checkbox"/>            | 367-374                 |
| <b>DATA</b>                               |     |                                                                                                                                                                                                                                             |                                     |                                     |                         |
| <b>Synthesis</b>                          | 15a | Describe criteria under which study data will be quantitatively synthesized                                                                                                                                                                 | <input type="checkbox"/>            | <input checked="" type="checkbox"/> |                         |
|                                           | 15b | If data are appropriate for quantitative synthesis, describe planned summary measures, methods of handling data, and methods of combining data from studies, including any planned exploration of consistency (e.g., $I^2$ , Kendall's tau) | <input type="checkbox"/>            | <input checked="" type="checkbox"/> |                         |
|                                           | 15c | Describe any proposed additional analyses (e.g., sensitivity or subgroup analyses, meta-                                                                                                                                                    | <input type="checkbox"/>            | <input checked="" type="checkbox"/> |                         |



| Section/topic                            | #   | Checklist item                                                                                                              | Information reported                |                                     | Line number(s) |
|------------------------------------------|-----|-----------------------------------------------------------------------------------------------------------------------------|-------------------------------------|-------------------------------------|----------------|
|                                          |     |                                                                                                                             | Yes                                 | No                                  |                |
|                                          |     | regression)                                                                                                                 |                                     |                                     |                |
|                                          | 15d | If quantitative synthesis is not appropriate, describe the type of summary planned                                          | <input checked="" type="checkbox"/> | <input type="checkbox"/>            | 375-381        |
| <b>Meta-bias(es)</b>                     | 16  | Specify any planned assessment of meta-bias(es) (e.g., publication bias across studies, selective reporting within studies) | <input type="checkbox"/>            | <input checked="" type="checkbox"/> |                |
| <b>Confidence in cumulative evidence</b> | 17  | Describe how the strength of the body of evidence will be assessed (e.g., GRADE)                                            | <input type="checkbox"/>            | <input checked="" type="checkbox"/> |                |

For peer review only

## Search strategy for MEDLINE

| #   | Query                                                                                                                                                                                                                                                                                                                                                                                                                                                                                                                                                                                                                                                                                                                                         | Limiters/Expanders                                                     |
|-----|-----------------------------------------------------------------------------------------------------------------------------------------------------------------------------------------------------------------------------------------------------------------------------------------------------------------------------------------------------------------------------------------------------------------------------------------------------------------------------------------------------------------------------------------------------------------------------------------------------------------------------------------------------------------------------------------------------------------------------------------------|------------------------------------------------------------------------|
| S17 | S3 AND S8 AND S15 AND S16                                                                                                                                                                                                                                                                                                                                                                                                                                                                                                                                                                                                                                                                                                                     | Expanders - Apply equivalent subjects<br>Search modes - Boolean/Phrase |
| S16 | AB review OR TI review                                                                                                                                                                                                                                                                                                                                                                                                                                                                                                                                                                                                                                                                                                                        | Expanders - Apply equivalent subjects<br>Search modes - Boolean/Phrase |
| S15 | S13 OR S14                                                                                                                                                                                                                                                                                                                                                                                                                                                                                                                                                                                                                                                                                                                                    | Expanders - Apply equivalent subjects<br>Search modes - Boolean/Phrase |
| S14 | S9 OR S10 OR S11 OR S12                                                                                                                                                                                                                                                                                                                                                                                                                                                                                                                                                                                                                                                                                                                       | Expanders - Apply equivalent subjects<br>Search modes - Boolean/Phrase |
| S13 | Involv* OR "advisory group*" OR "research advisory group" OR "research advisory panel*" OR "advisory panel" OR "advisory committee*" OR "advisory board*" OR "youth engagement" OR "patient and public involvement" OR "public and patient involvement" OR "public patient involvement" OR "community based participatory research" OR "youth particip*" OR "adolescent engagement" OR "participatory design" OR "participatory action" OR "needs assessment*" OR "co produc*" OR "co design" OR "Human centered design" OR "Human centred design" OR "User centered design" OR "User centred design" OR "user involvement" OR "peer researcher*" OR "co researcher*" OR "Patient Participation" OR "young researcher*" OR "lived experience" | Expanders - Apply equivalent subjects<br>Search modes - Boolean/Phrase |
| S12 | (MM "Community Participation+")                                                                                                                                                                                                                                                                                                                                                                                                                                                                                                                                                                                                                                                                                                               | Expanders - Apply equivalent subjects<br>Search modes - Boolean/Phrase |
| S11 | (MM "Community-Based Participatory Research+")                                                                                                                                                                                                                                                                                                                                                                                                                                                                                                                                                                                                                                                                                                | Expanders - Apply equivalent subjects<br>Search modes - Boolean/Phrase |
| S10 | (MM "Patient Participation")                                                                                                                                                                                                                                                                                                                                                                                                                                                                                                                                                                                                                                                                                                                  | Expanders - Apply equivalent subjects<br>Search modes - Boolean/Phrase |
| S9  | (MM "Stakeholder Participation+")                                                                                                                                                                                                                                                                                                                                                                                                                                                                                                                                                                                                                                                                                                             | Expanders - Apply equivalent subjects<br>Search modes - Boolean/Phrase |
| S8  | S4 OR S7                                                                                                                                                                                                                                                                                                                                                                                                                                                                                                                                                                                                                                                                                                                                      | Expanders - Apply equivalent subjects<br>Search modes - Boolean/Phrase |
| S7  | S5 OR S6                                                                                                                                                                                                                                                                                                                                                                                                                                                                                                                                                                                                                                                                                                                                      | Expanders - Apply equivalent subjects<br>Search modes - Boolean/Phrase |
| S6  | (MM "Young Adult")                                                                                                                                                                                                                                                                                                                                                                                                                                                                                                                                                                                                                                                                                                                            | Expanders - Apply equivalent subjects<br>Search modes - Boolean/Phrase |
| S5  | (MM "Adolescent")                                                                                                                                                                                                                                                                                                                                                                                                                                                                                                                                                                                                                                                                                                                             | Expanders - Apply equivalent subjects<br>Search modes - Boolean/Phrase |

|    |                                                                                                                                                                                                                                 |                                                                        |
|----|---------------------------------------------------------------------------------------------------------------------------------------------------------------------------------------------------------------------------------|------------------------------------------------------------------------|
| S4 | AB (child* OR youth OR adolescen* OR "young people" OR "Young person*" OR "Young adult*" OR teen* OR juven* ) OR TI ( child* OR youth OR adolescen* OR "young people" OR "Young person*" OR "Young adult*" OR teen* OR juven* ) | Expanders - Apply equivalent subjects<br>Search modes - Boolean/Phrase |
| S3 | S1 OR S2                                                                                                                                                                                                                        | Expanders - Apply equivalent subjects<br>Search modes - Boolean/Phrase |
| S2 | AB "health research" OR TI "health research"                                                                                                                                                                                    | Expanders - Apply equivalent subjects<br>Search modes - Boolean/Phrase |
| S1 | (MM "Health Services Research+")                                                                                                                                                                                                | Expanders - Apply equivalent subjects<br>Search modes - Boolean/Phrase |

### Search strategy for Web of science

(((TS=(review)) AND TS=(“Health research” )) AND TS=(child\* OR youth OR adolescen\* OR "young people" OR "Young person\*" OR "Young adult\*" OR teen\* OR juven\*)) AND TS=(Involv\* OR "advisory group\*" OR "research advisory group" OR "research advisory panel\*" OR "advisory panel" OR "advisory committee\*" OR "advisory board\*" OR "youth engagement" OR "patient and public involvement" OR "public and patient involvement" OR "public patient involvement" OR "community based participatory research" OR "youth particip\*" OR "adolescent engagement" OR "participatory design" OR "participatory action" OR "needs assessment\*" OR "co produc\*" OR "co design" OR "Human centered design" OR "Human centred design" OR "User centered design" OR "User centred design" OR "user involvement" OR "peer researcher\*" OR "co researcher\*" OR "Patient Participation" OR "young researcher\*" OR “lived experience”)
