# Supplementary material for: Involving adolescents in the design, implementation, evaluation and dissemination of health research: an umbrella review protocol
Source: PubMed Central journal article supplement — BMJ Open. 2023 Jun 2;13(6):e069695. doi: 10.1136/bmjopen-2022-069695 (PMC10254960; doi:10.1136/bmjopen-2022-069695), 2023-06-02
Supplement: bmjopen-2022-069695supp003.pdf [file bmjopen-2022-069695supp003.pdf]

### Search strategy for Web of science

((((TS=(review)) AND TS=(“Health research” )) AND TS=(child\* OR youth OR adolescen\* OR "young people" OR "Young person\*" OR "Young adult\*" OR teen\* OR juven\*)) AND TS=(Involv\* OR "advisory group\*" OR "research advisory group" OR "research advisory panel\*" OR "advisory panel" OR "advisory committee\*" OR "advisory board\*" OR "youth engagement" OR "patient and public involvement" OR "public and patient involvement" OR "public patient involvement" OR "community based participatory research" OR "youth particip\*" OR "adolescent engagement" OR "participatory design" OR "participatory action" OR "needs assessment\*" OR "co produc\*" OR "co design" OR "Human centered design" OR "Human centred design" OR "User centered design" OR "User centred design" OR "user involvement" OR "peer researcher\*" OR "co researcher\*" OR "Patient Participation" OR "young researcher\*" OR “lived experience”))
